# Supplementary material for: K2S2O8/I2promoted syntheses of α-thio-β-dicarbonyl compounds via oxidative C–S coupling reactions under transition metal-free and solvent-free conditions
Source: Royal Society of Chemistry journal article supplement (doi:10.1039/c5ra07204b), 2015-01-01

# **K<sub>2</sub>S<sub>2</sub>O<sub>8</sub>/I<sub>2</sub> Promoted Syntheses of $\alpha$ -Thio- $\beta$ -dicarbonyl Compounds *via* Oxidative C-S Coupling Reactions Under Transition Metal Free and Solvent Free Conditions**

Yi-Wei Liu,<sup>†</sup> Satpal Singh Badsara,<sup>†</sup> Yi-Chen Liu, and Chin-Fa Lee\*

Department of Chemistry, National Chung Hsing University, Taichung, Taiwan 402, R.O.C

*E-mail:* [cfalee@dragon.nchu.edu.tw](mailto:cfalee@dragon.nchu.edu.tw); Fax: +886 4 2286-2547; Tel: +886 4 2284-0411 ext. 810

<sup>†</sup> *Both authors contributed equally to this work.*

**NMR Spectra of Compound 3a-3y**

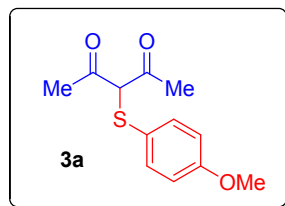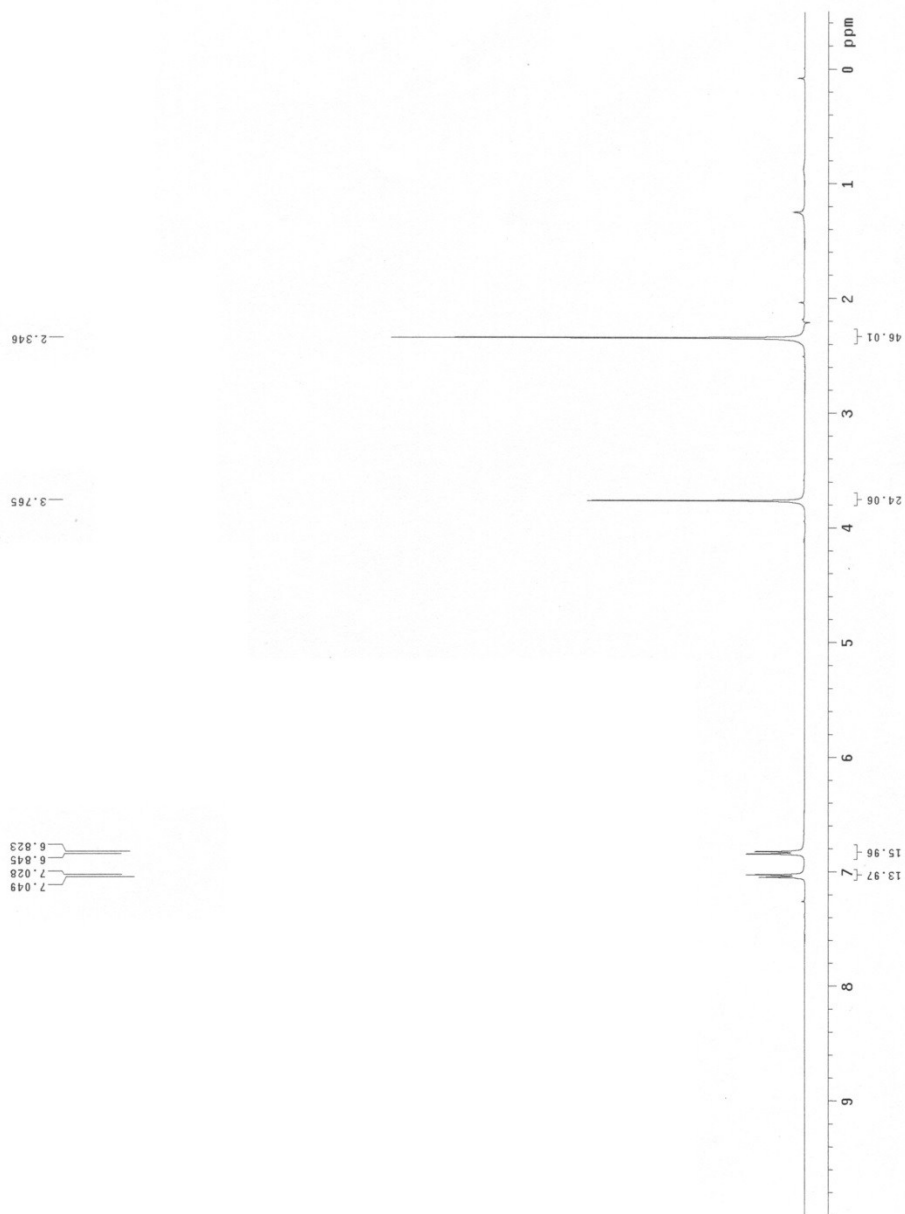

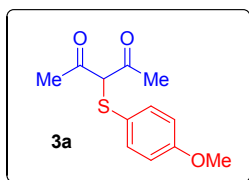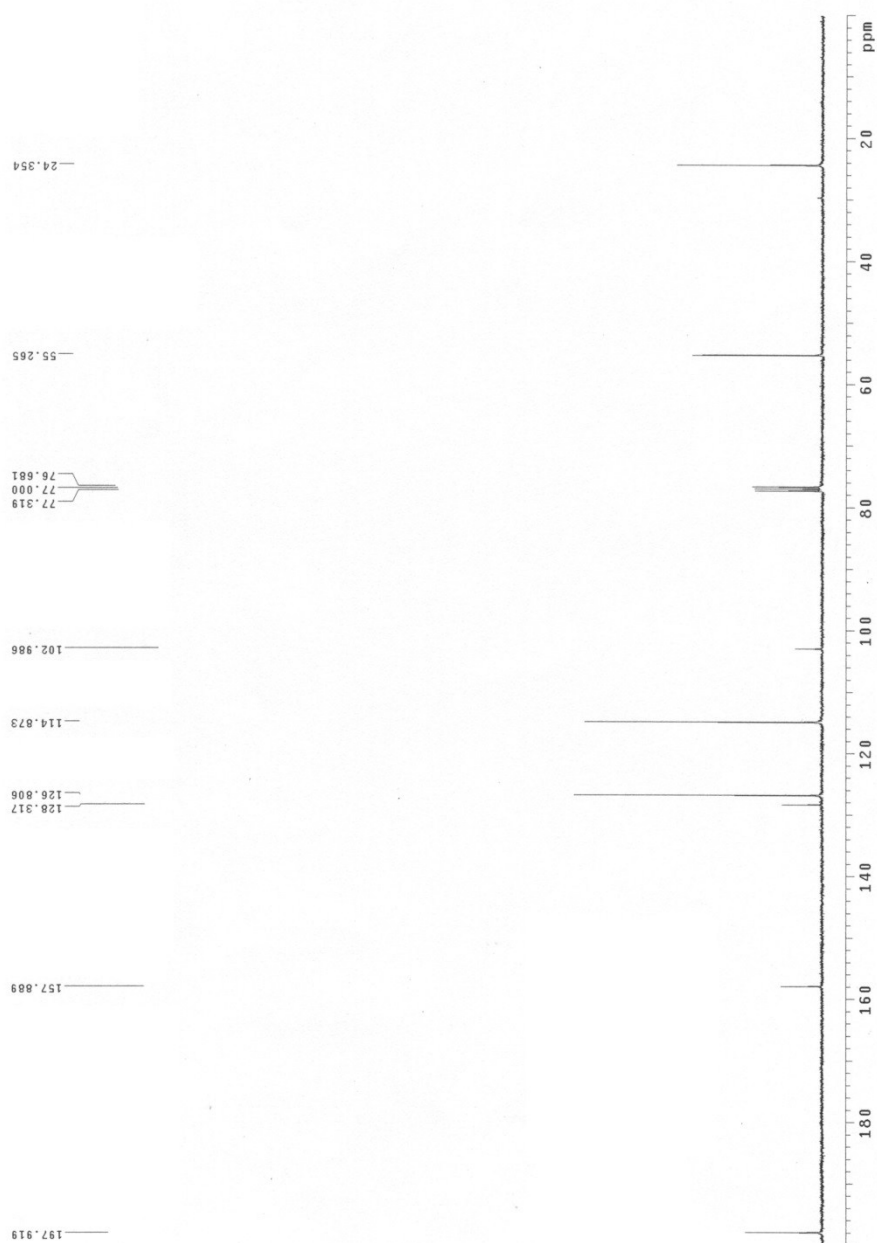

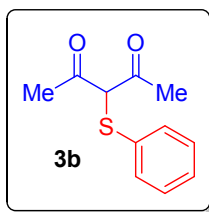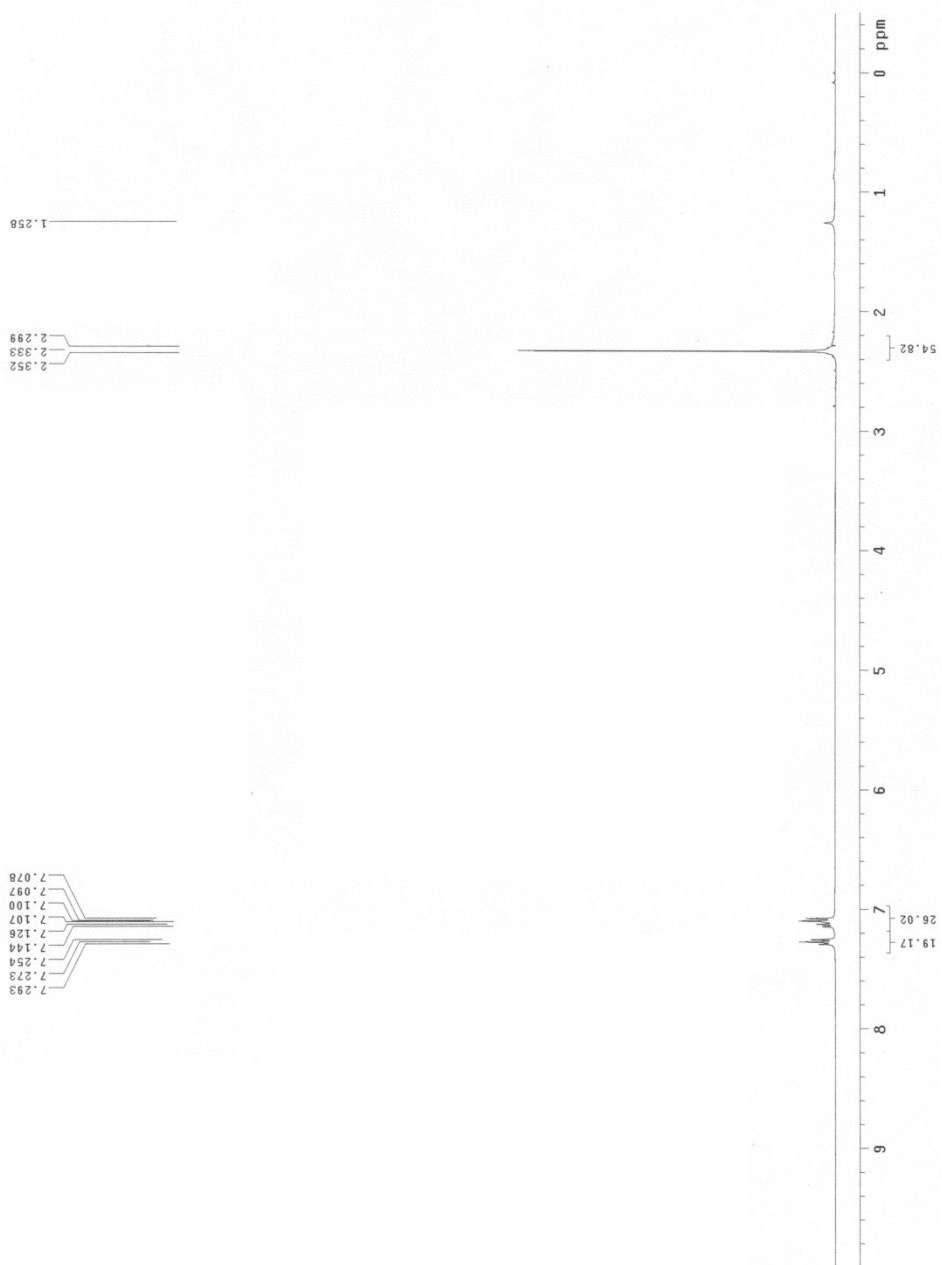

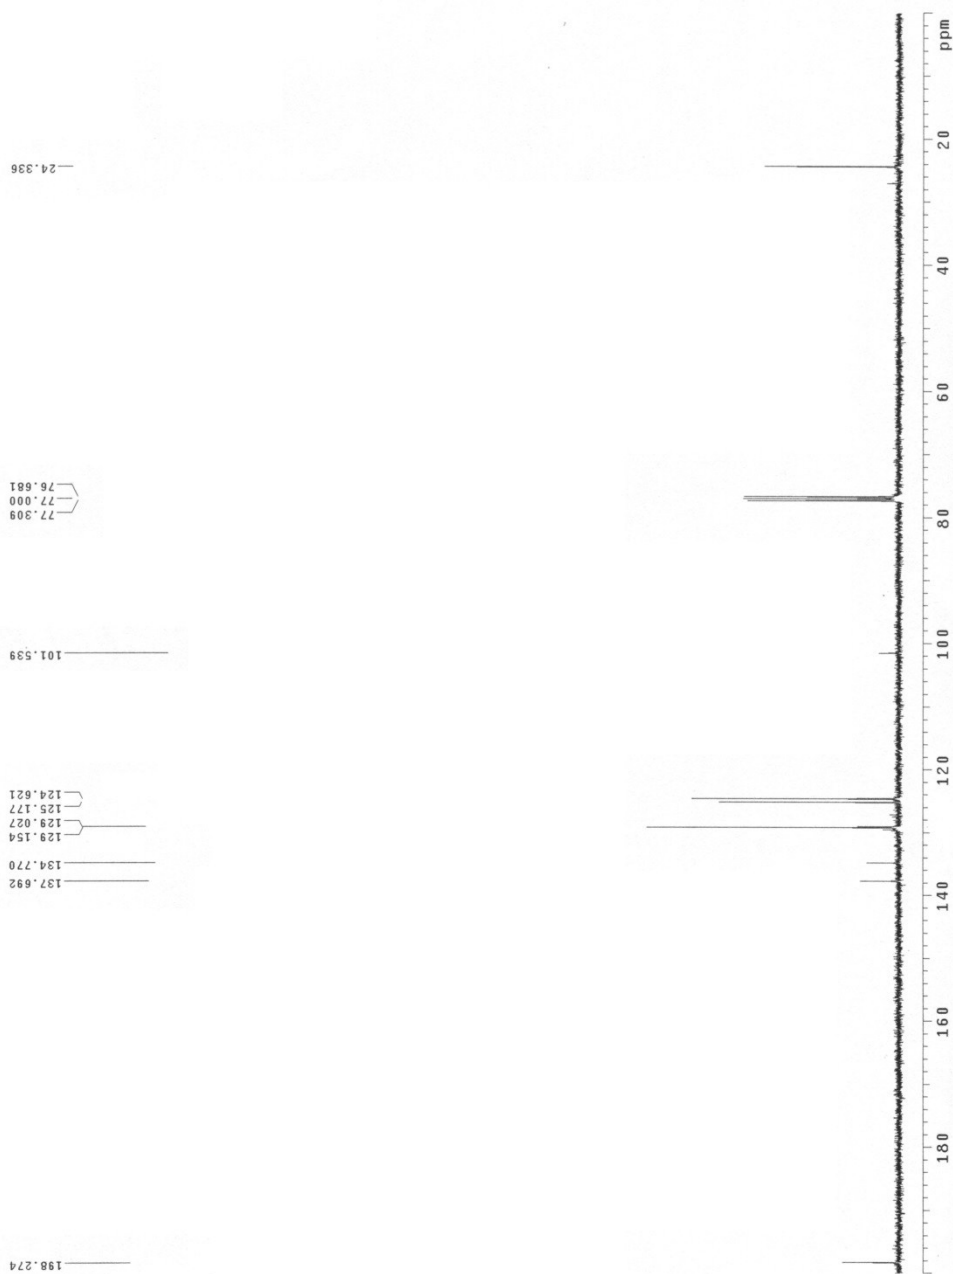

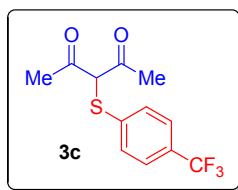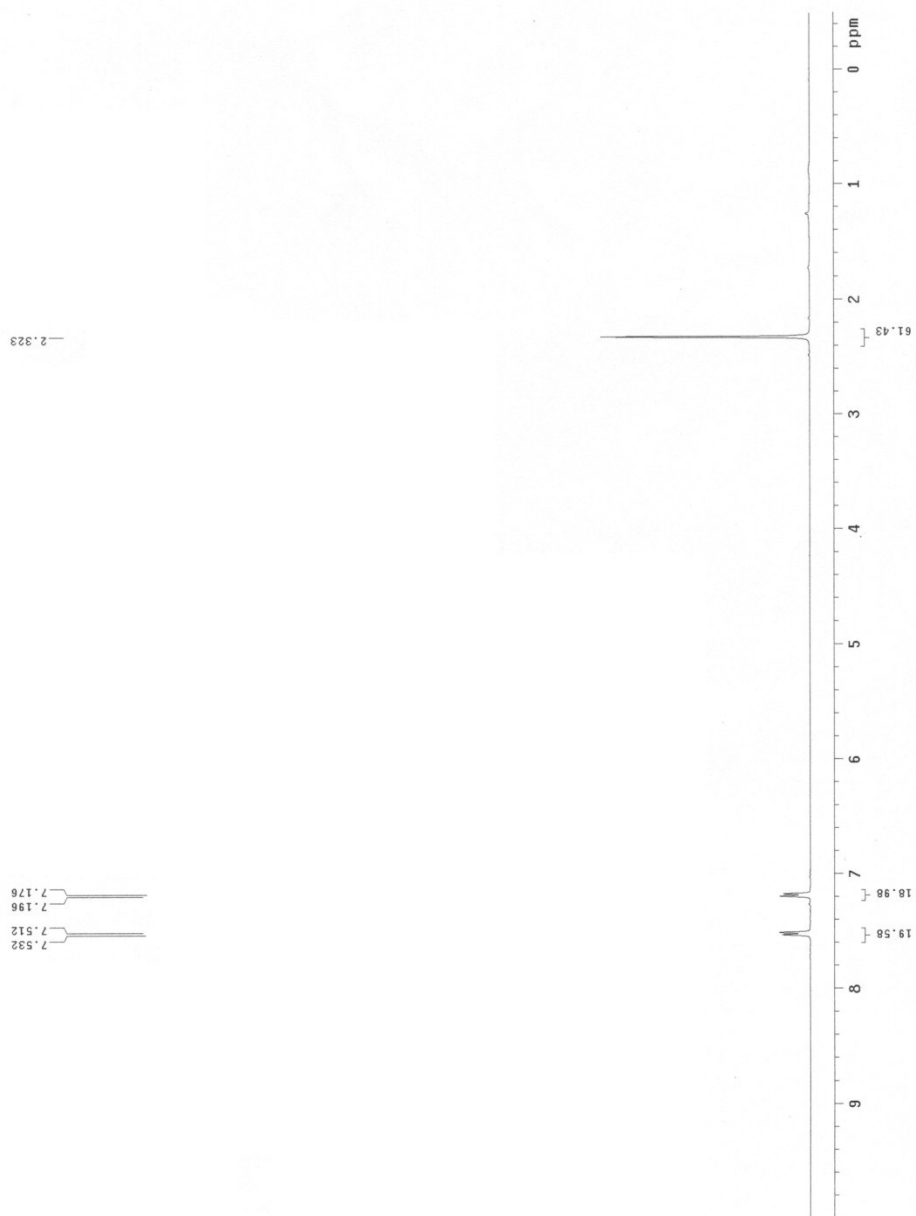

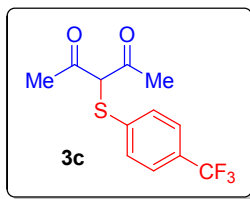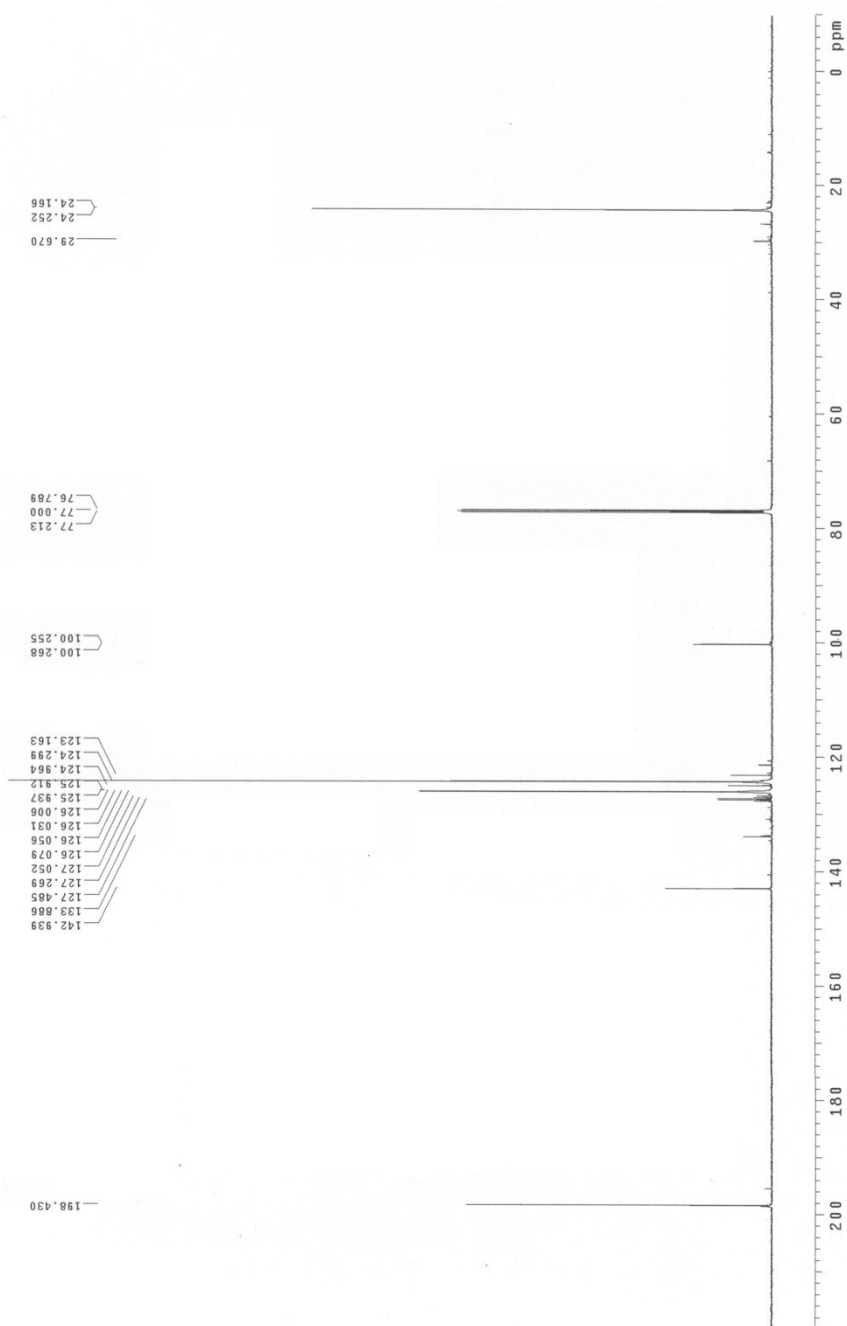

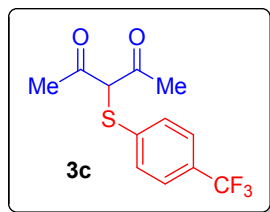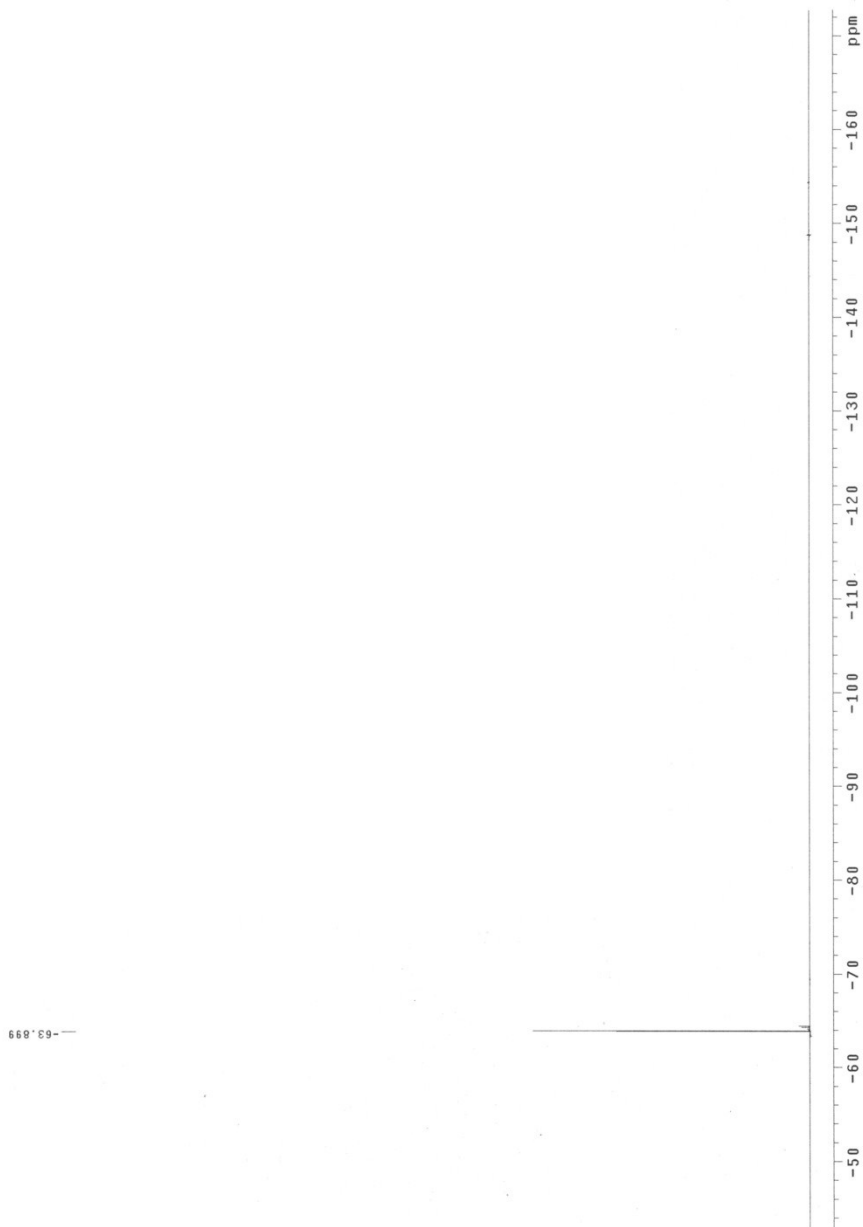



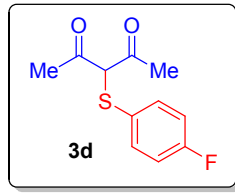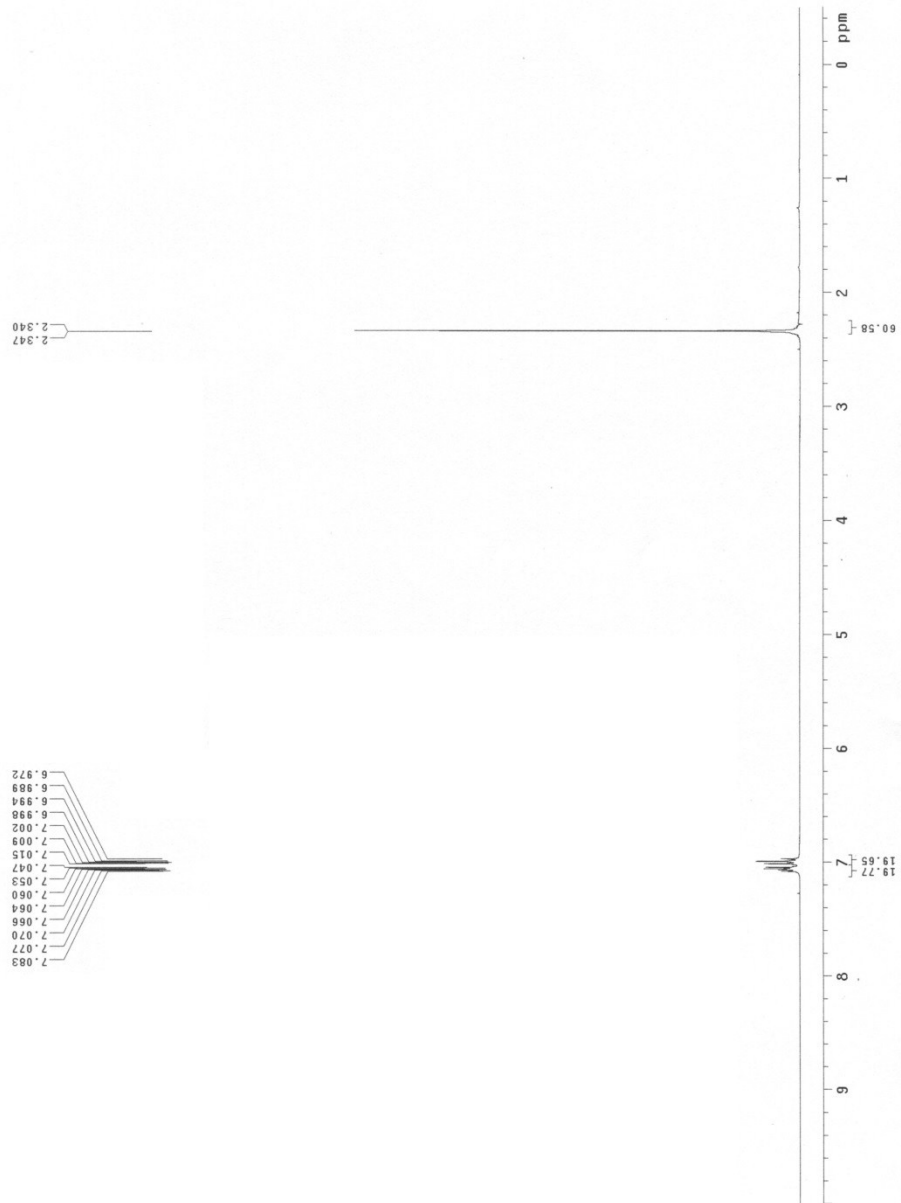

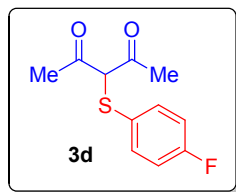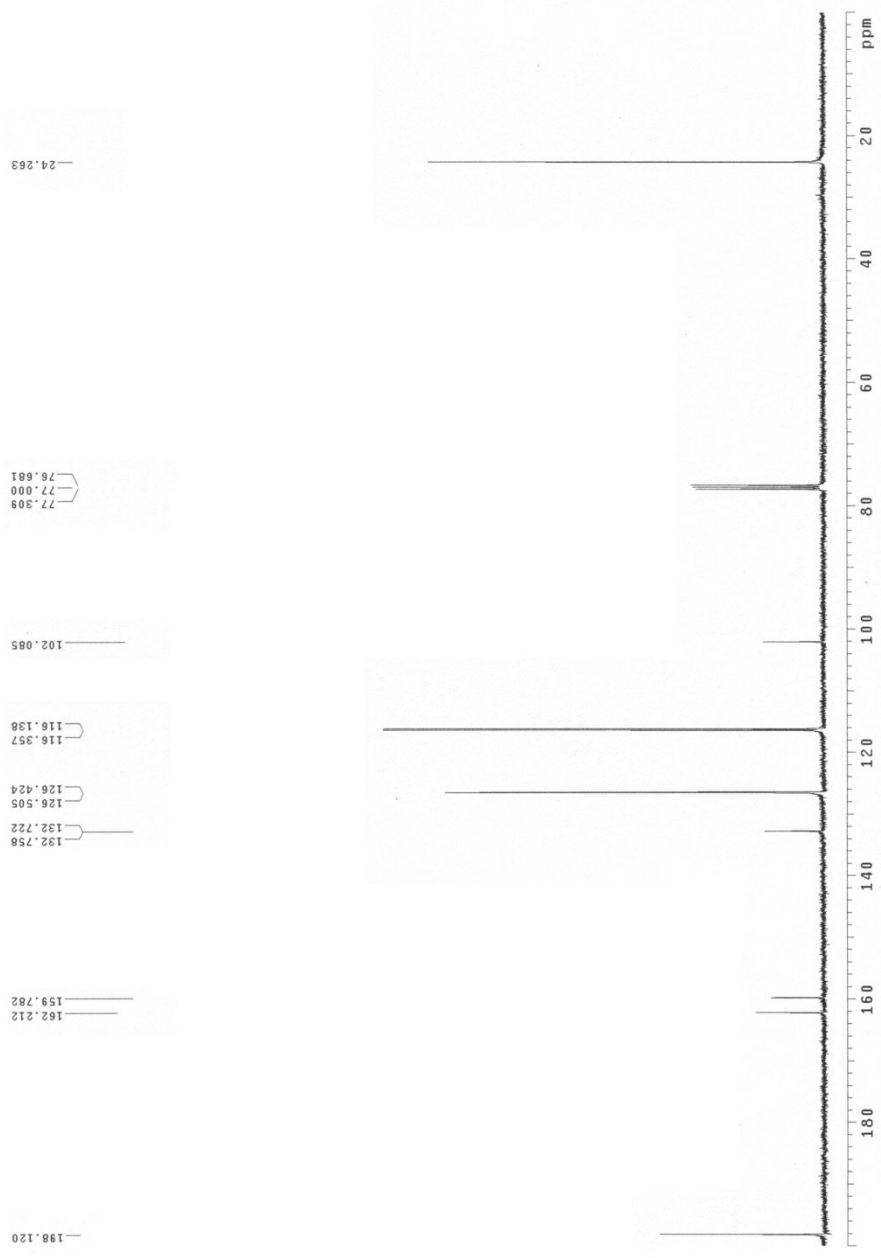

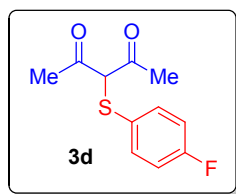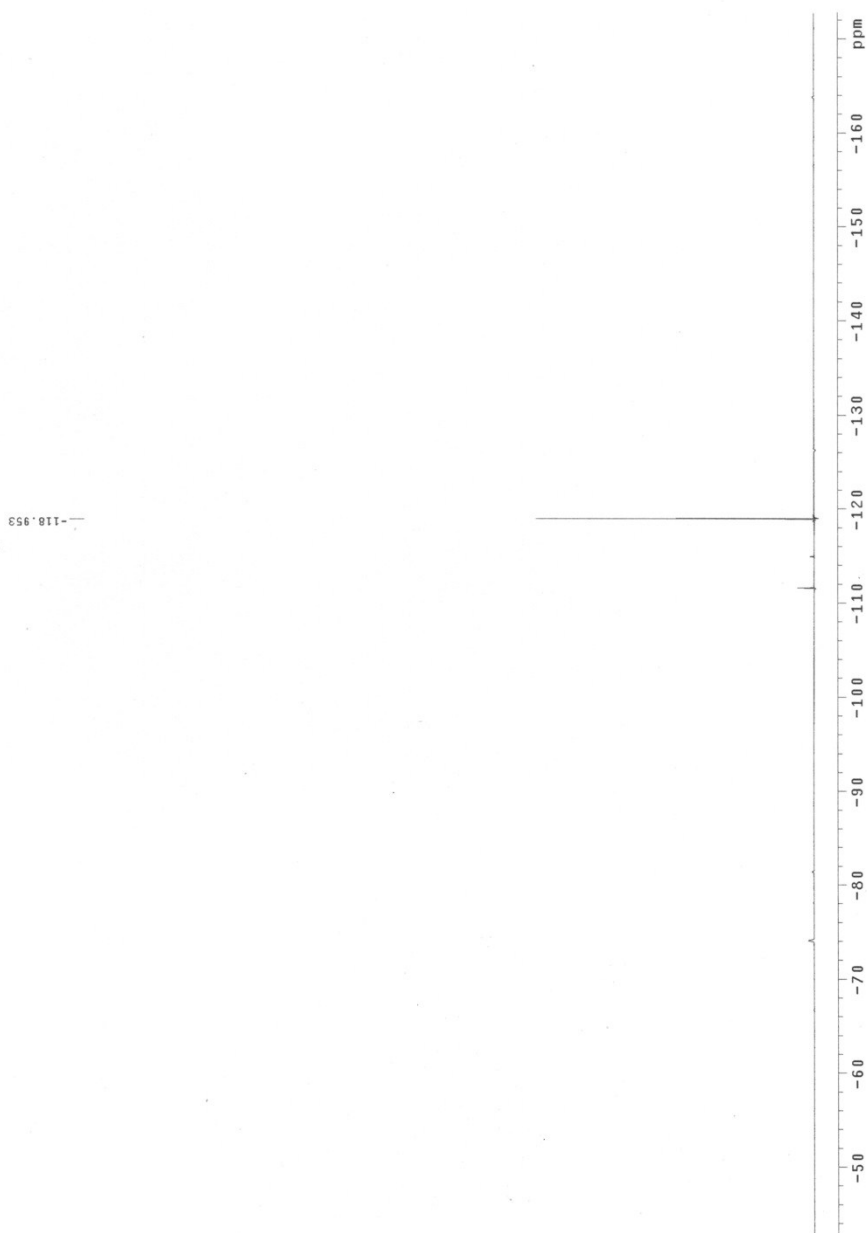

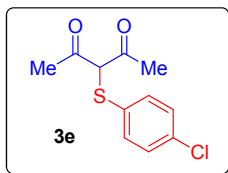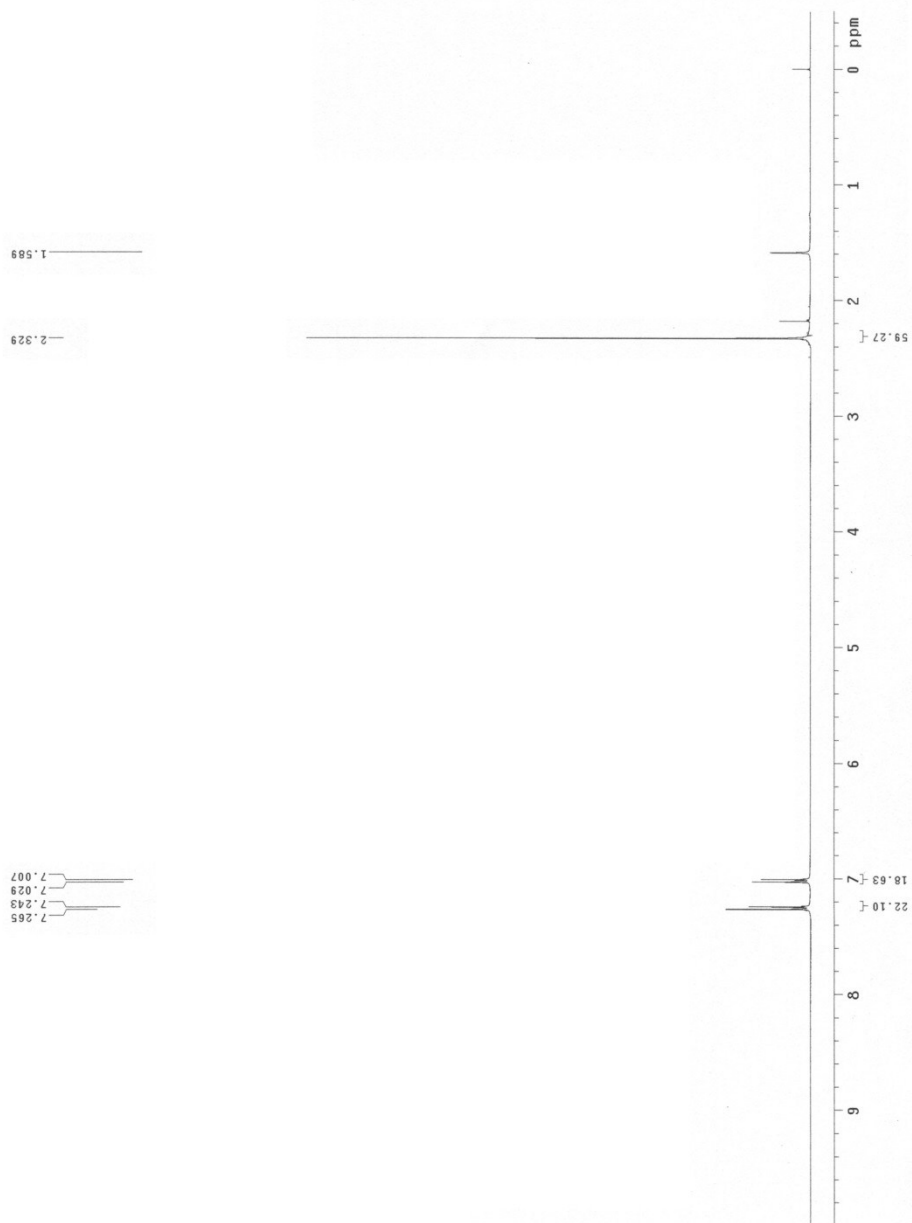

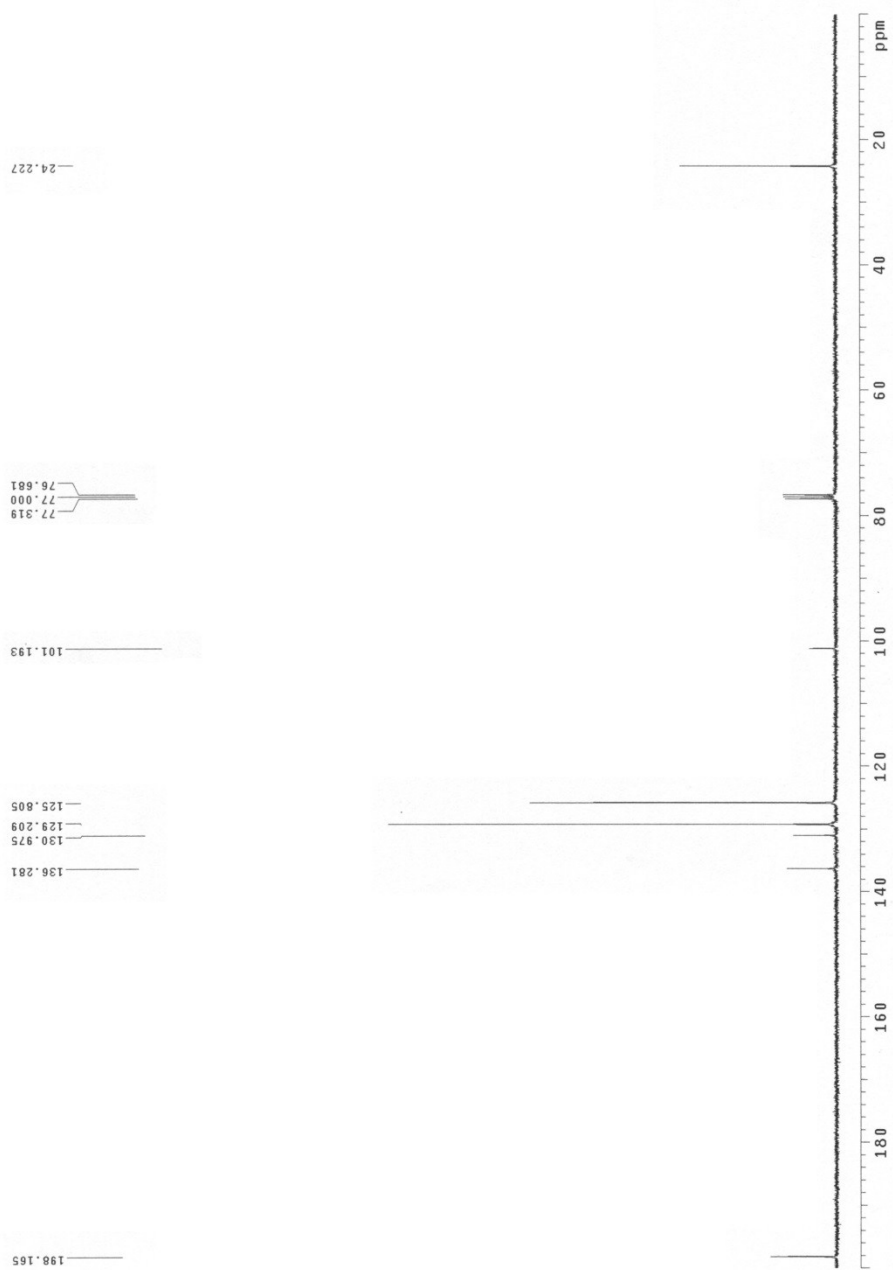

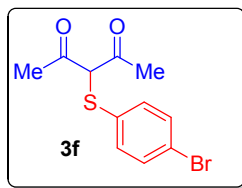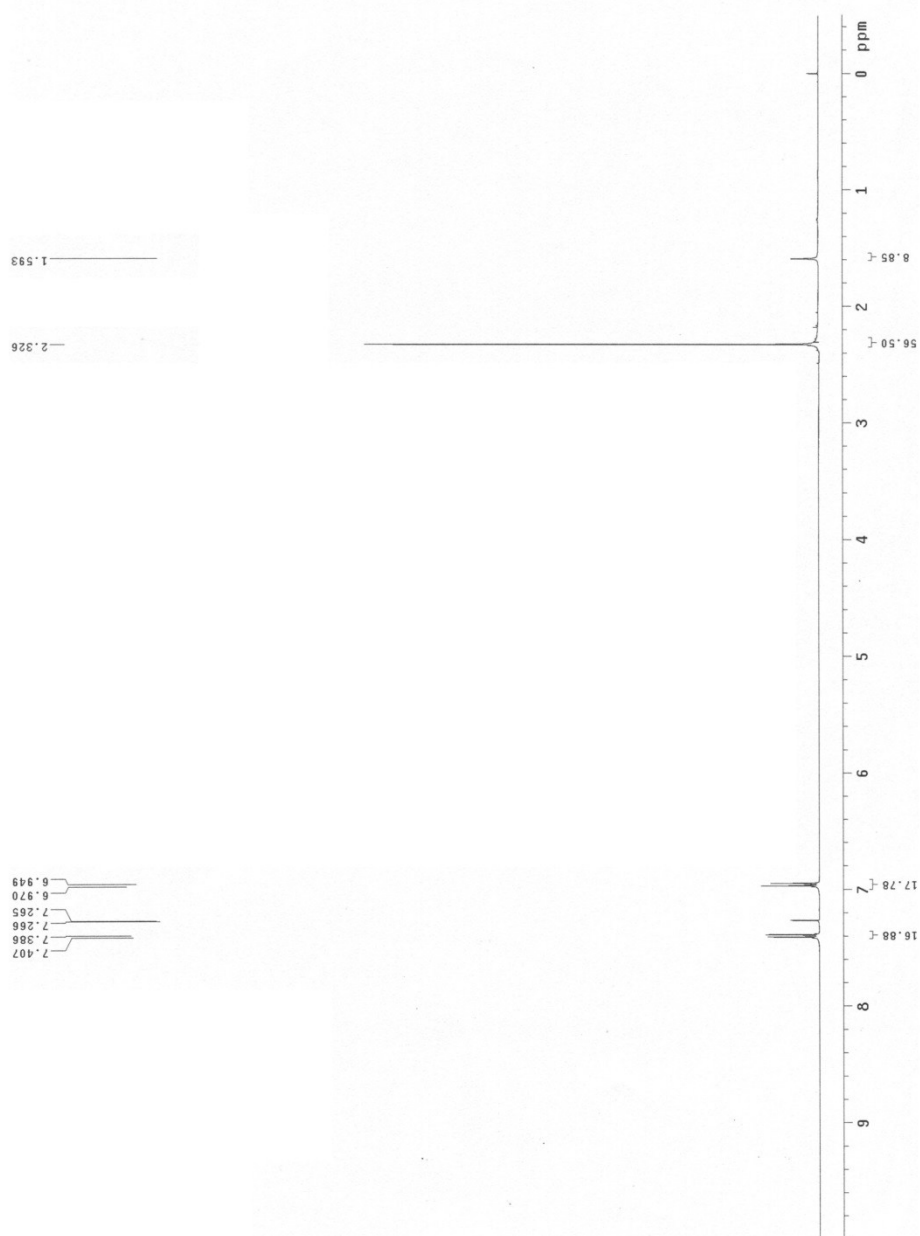

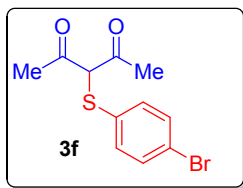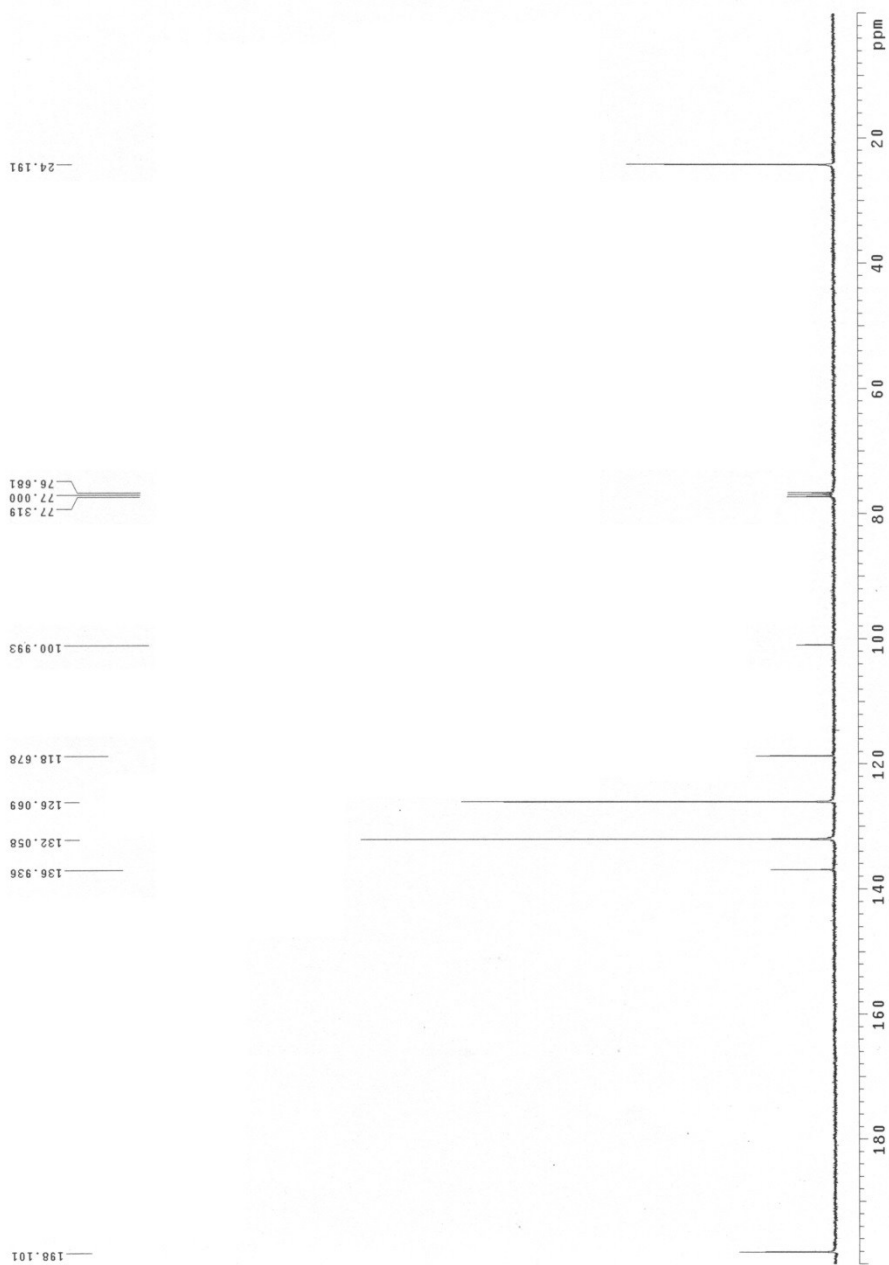

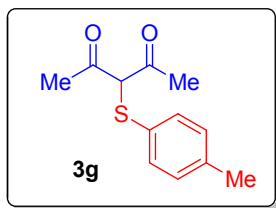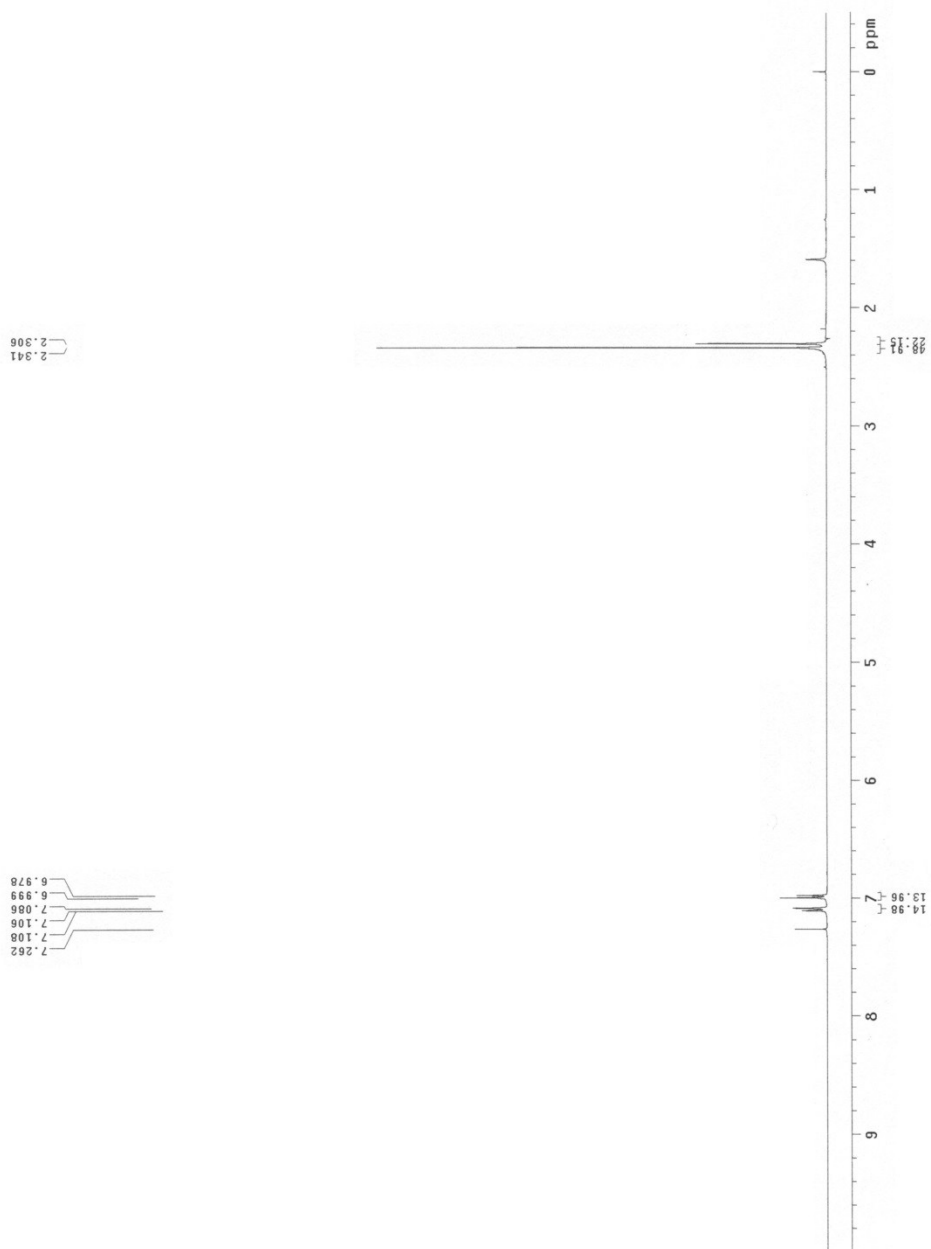



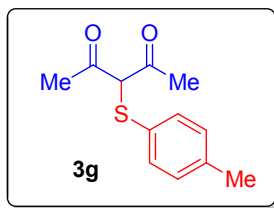

24.300  
20.759

77.319  
77.000  
76.691

101.967

124.812  
129.882  
134.106  
134.970

198.101

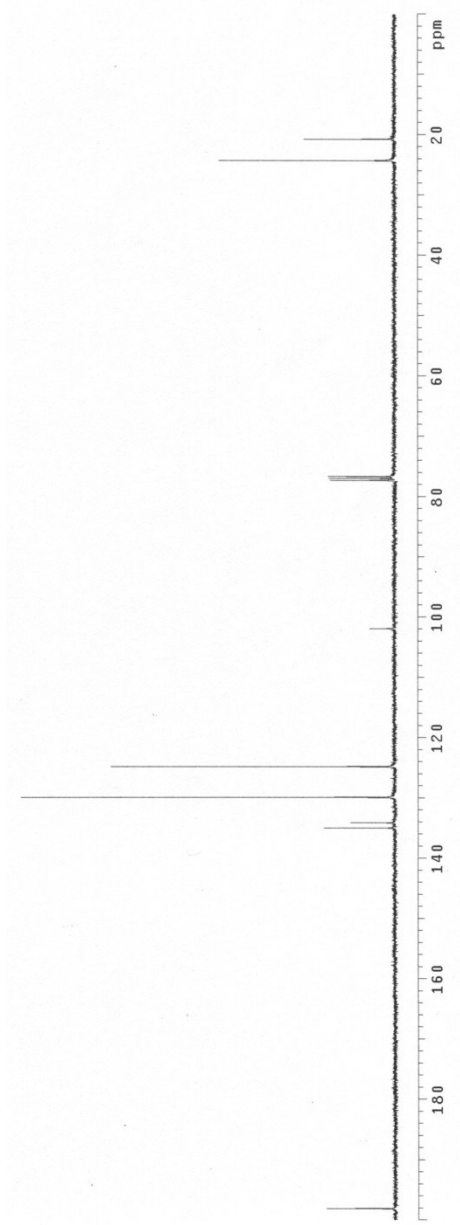

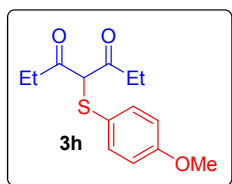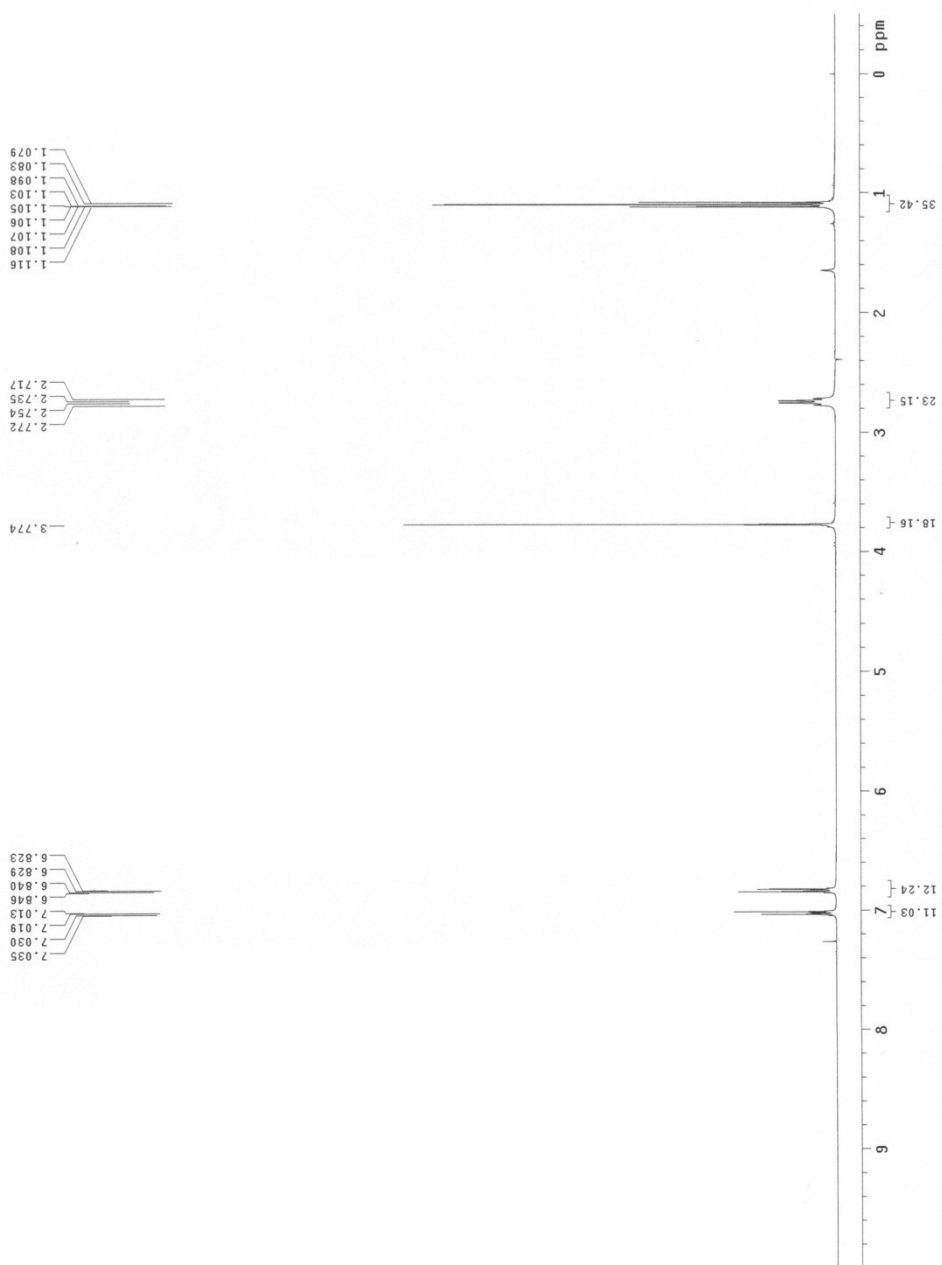

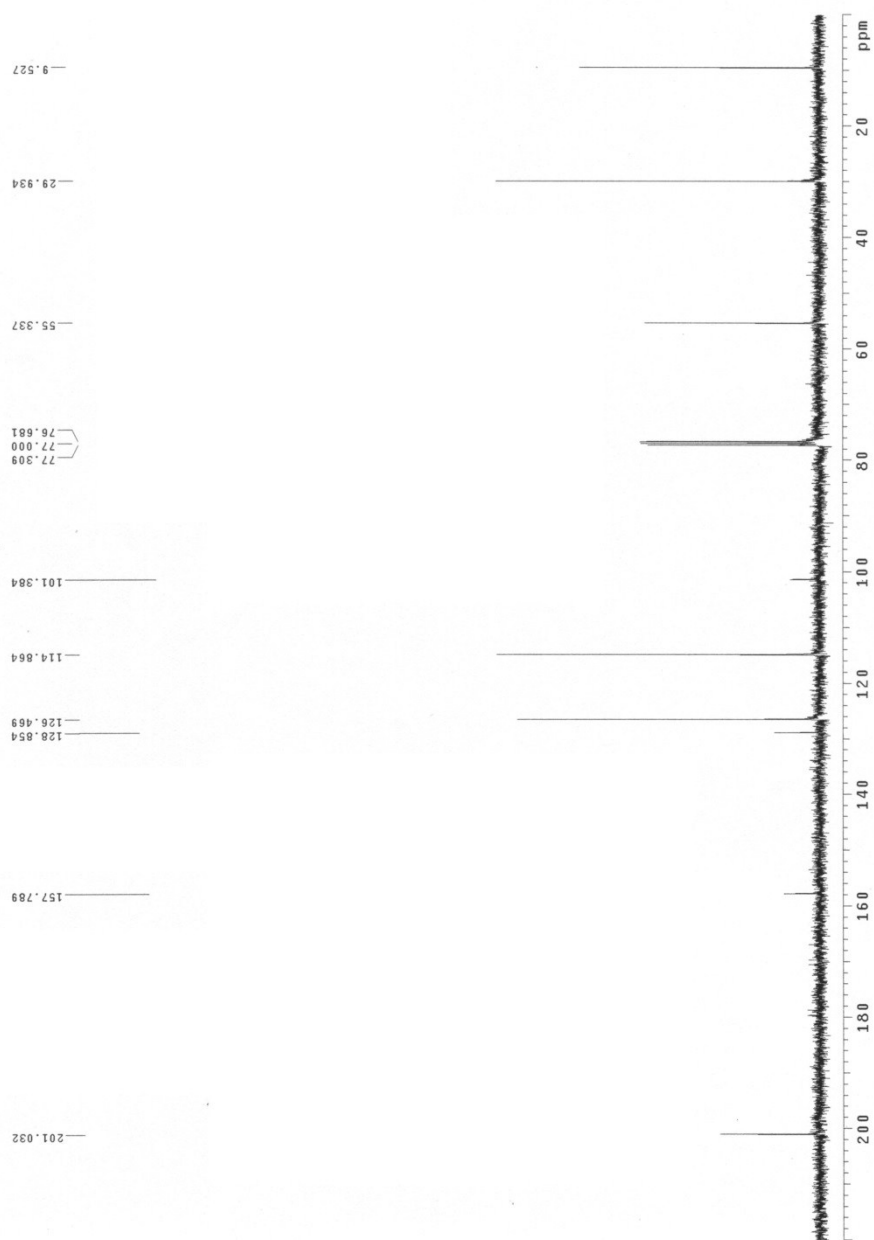

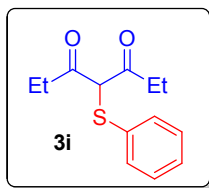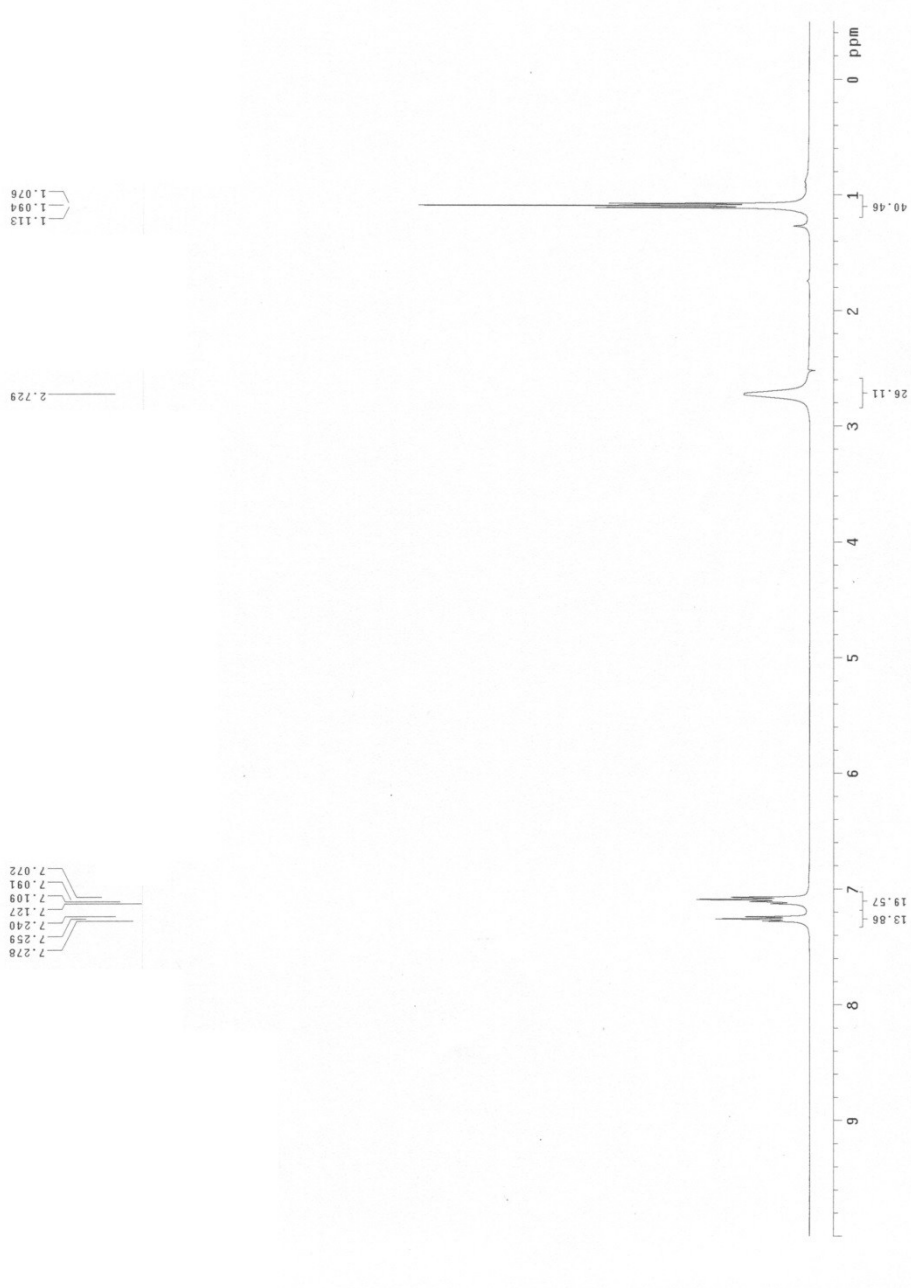

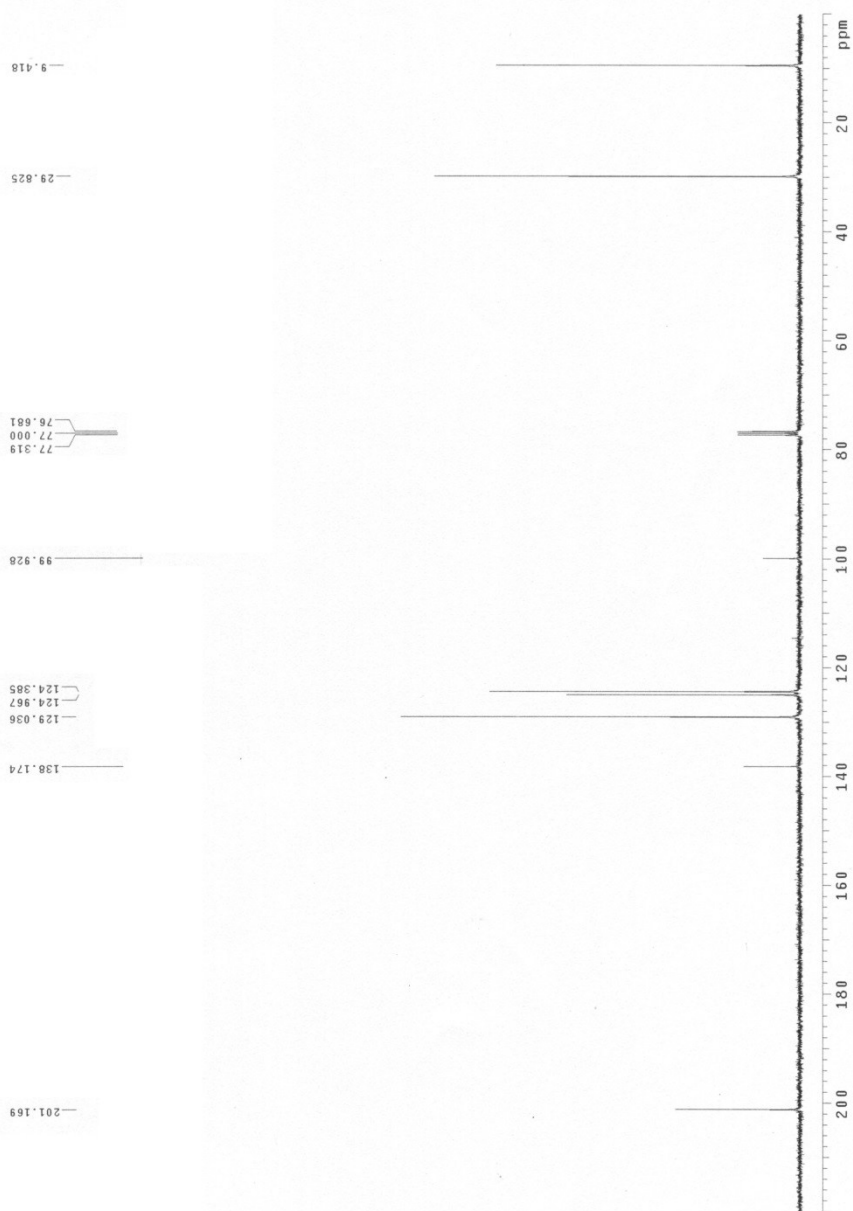

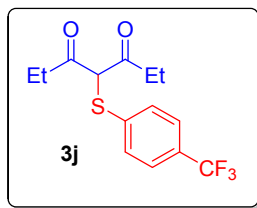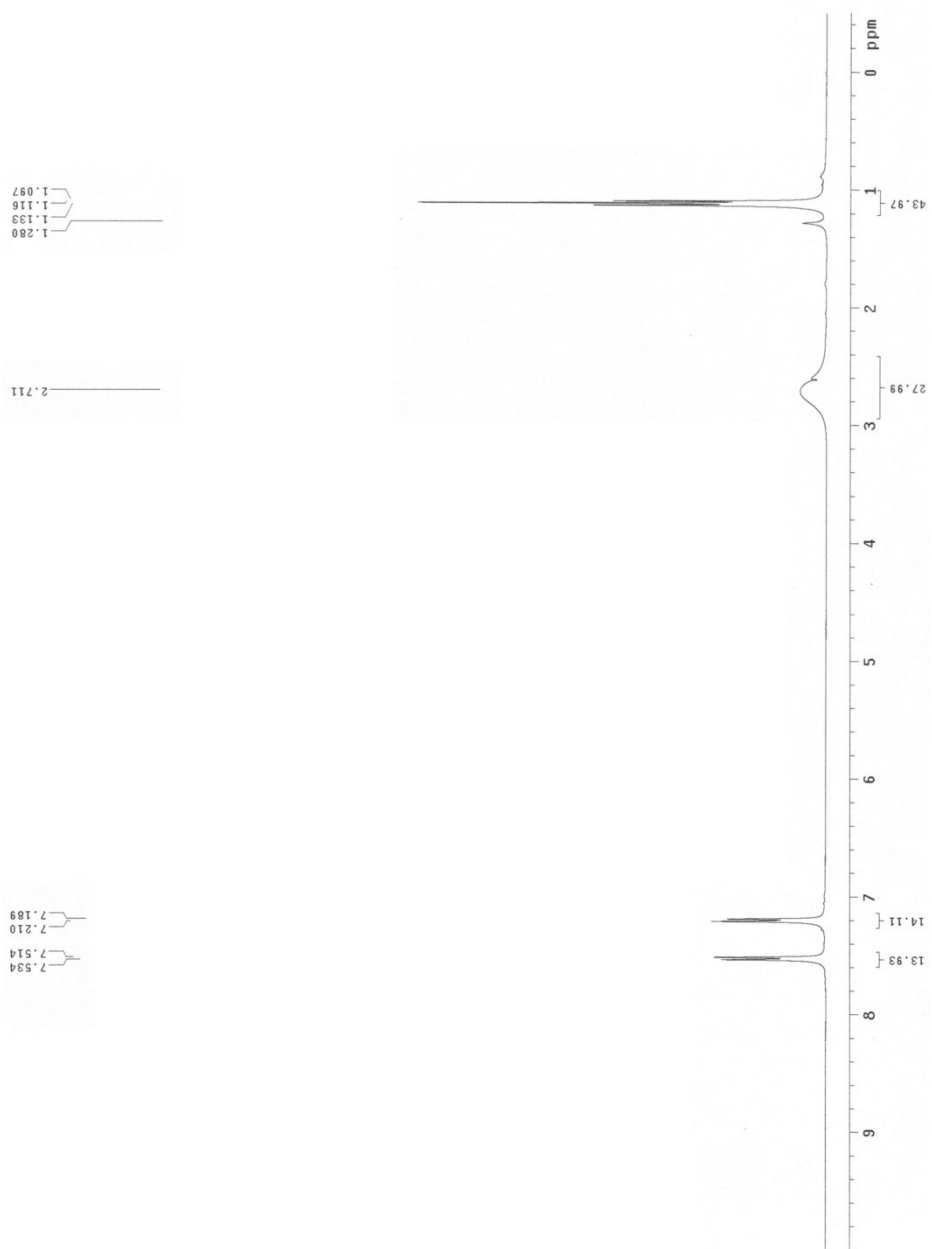

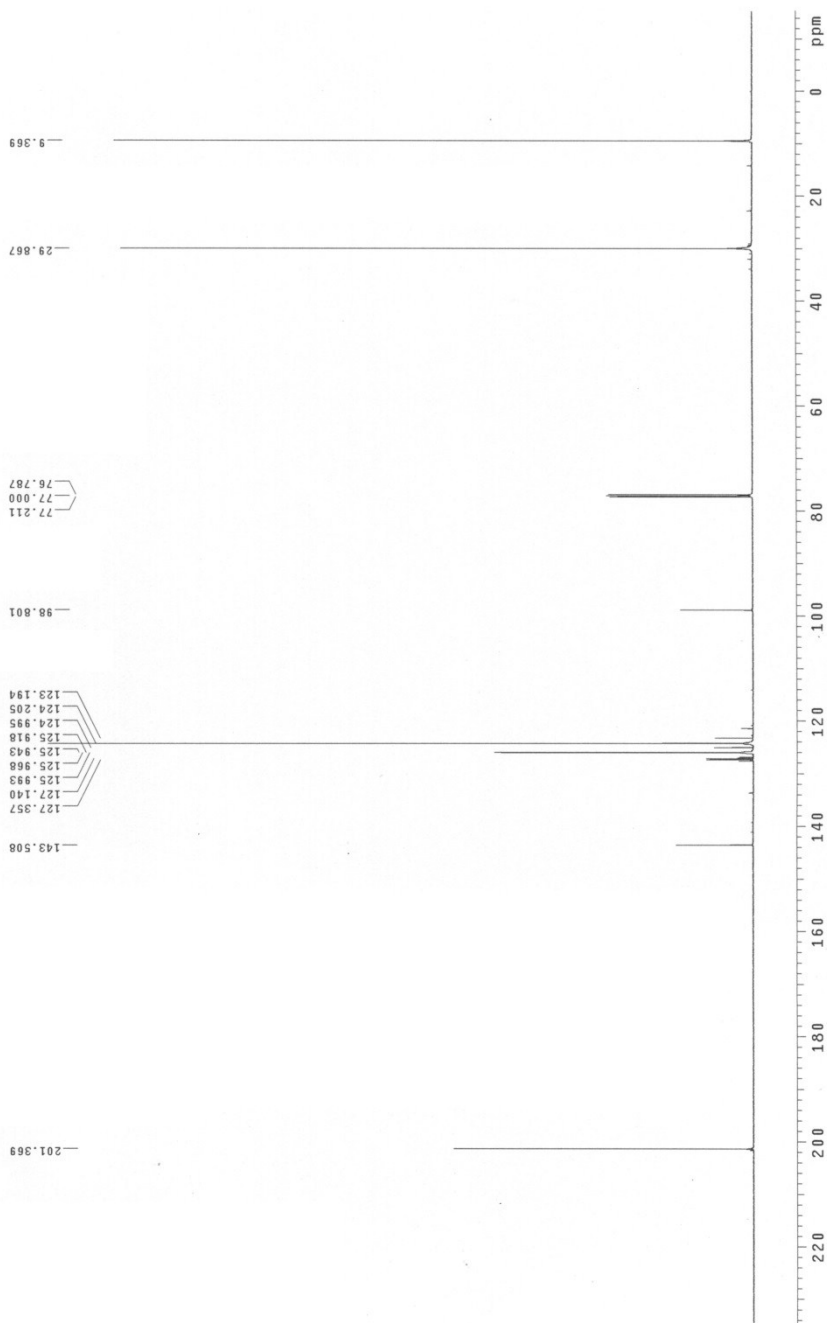

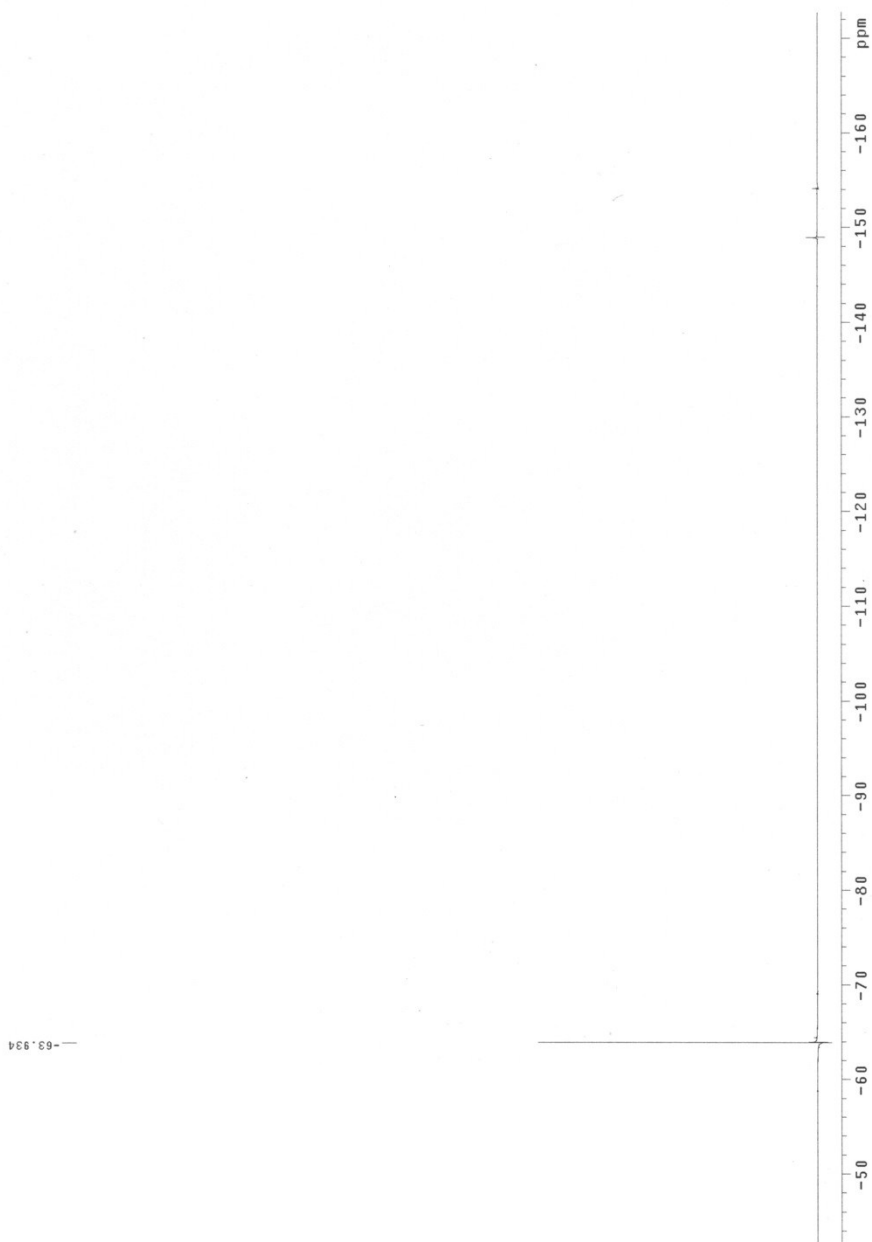



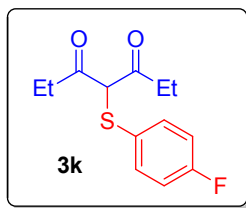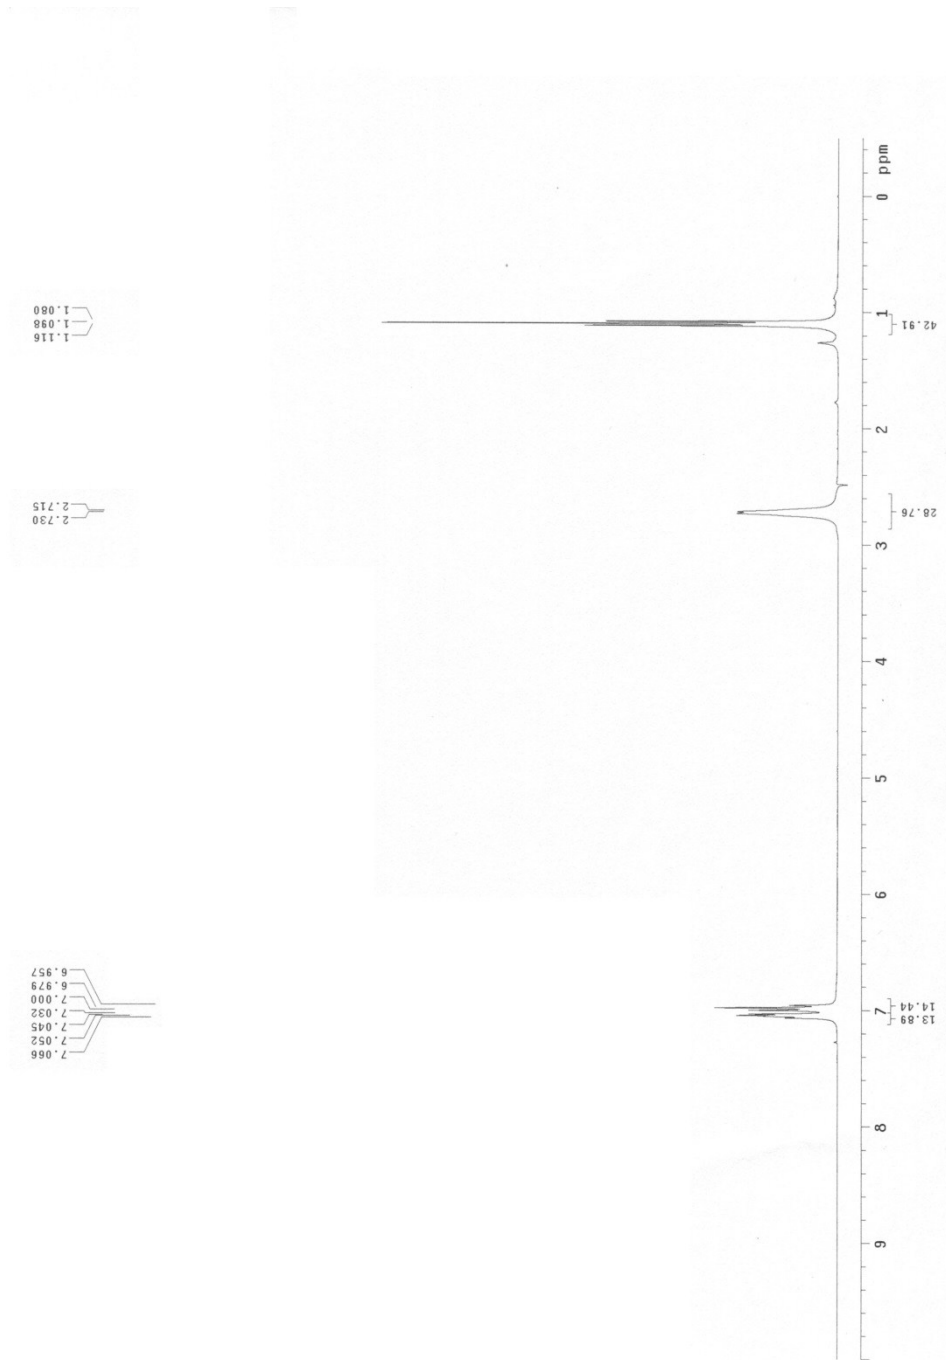

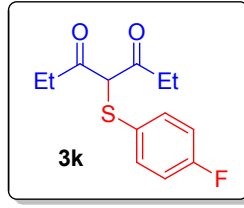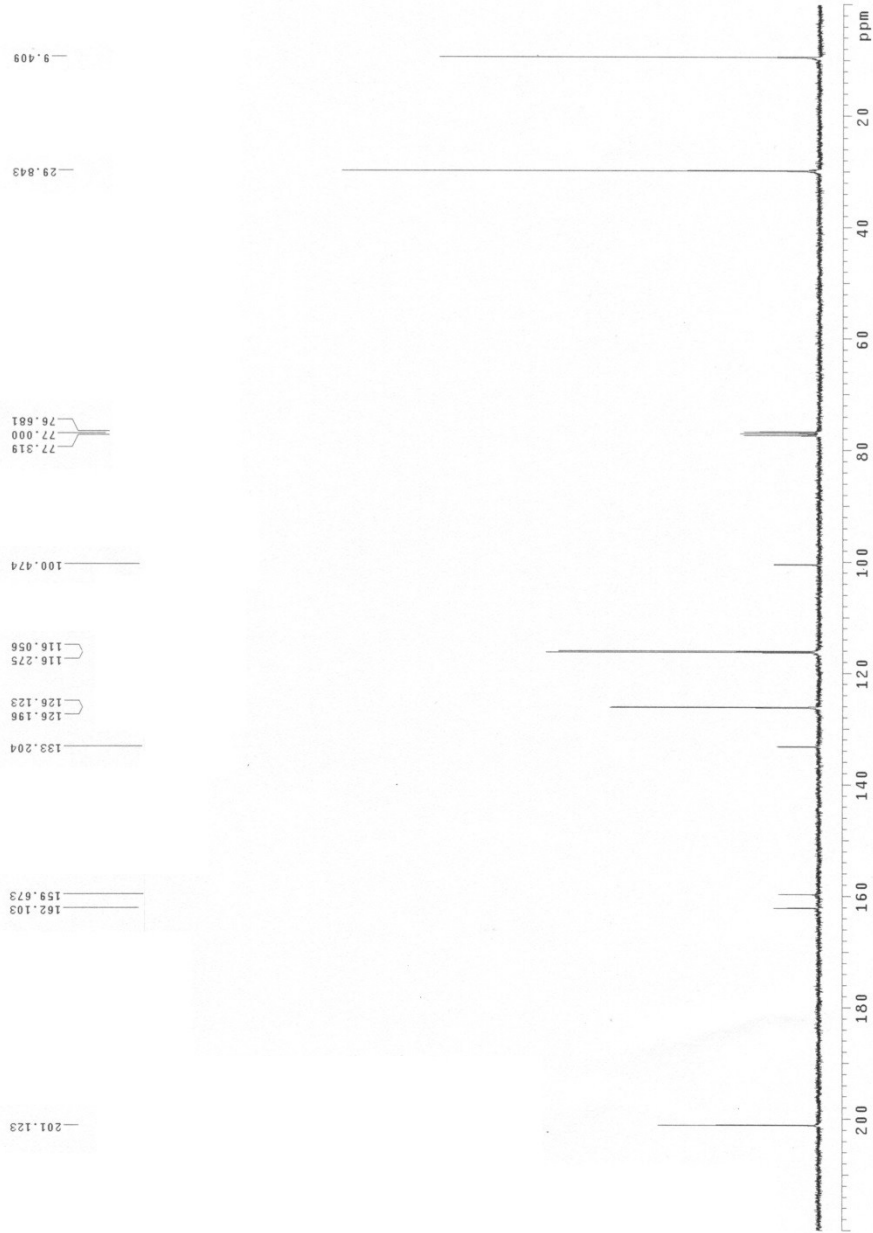

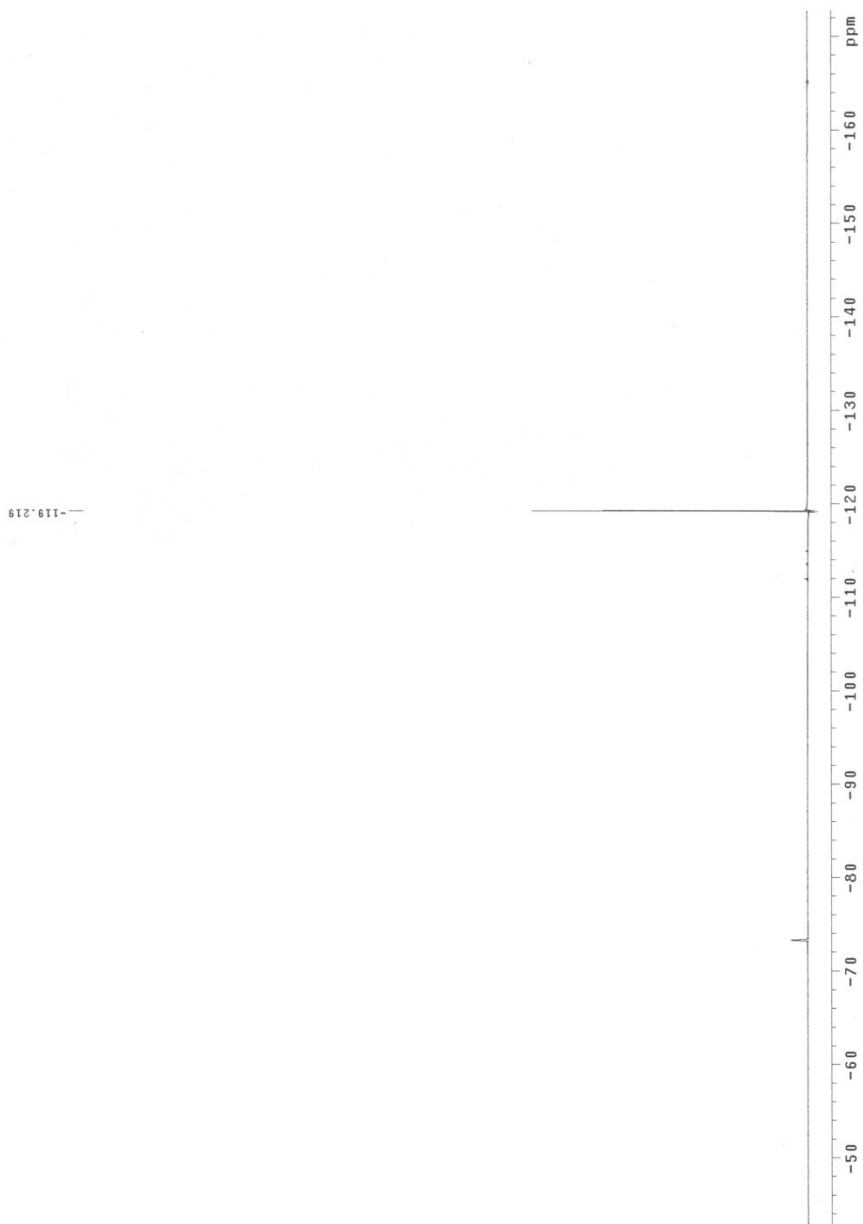

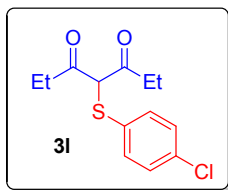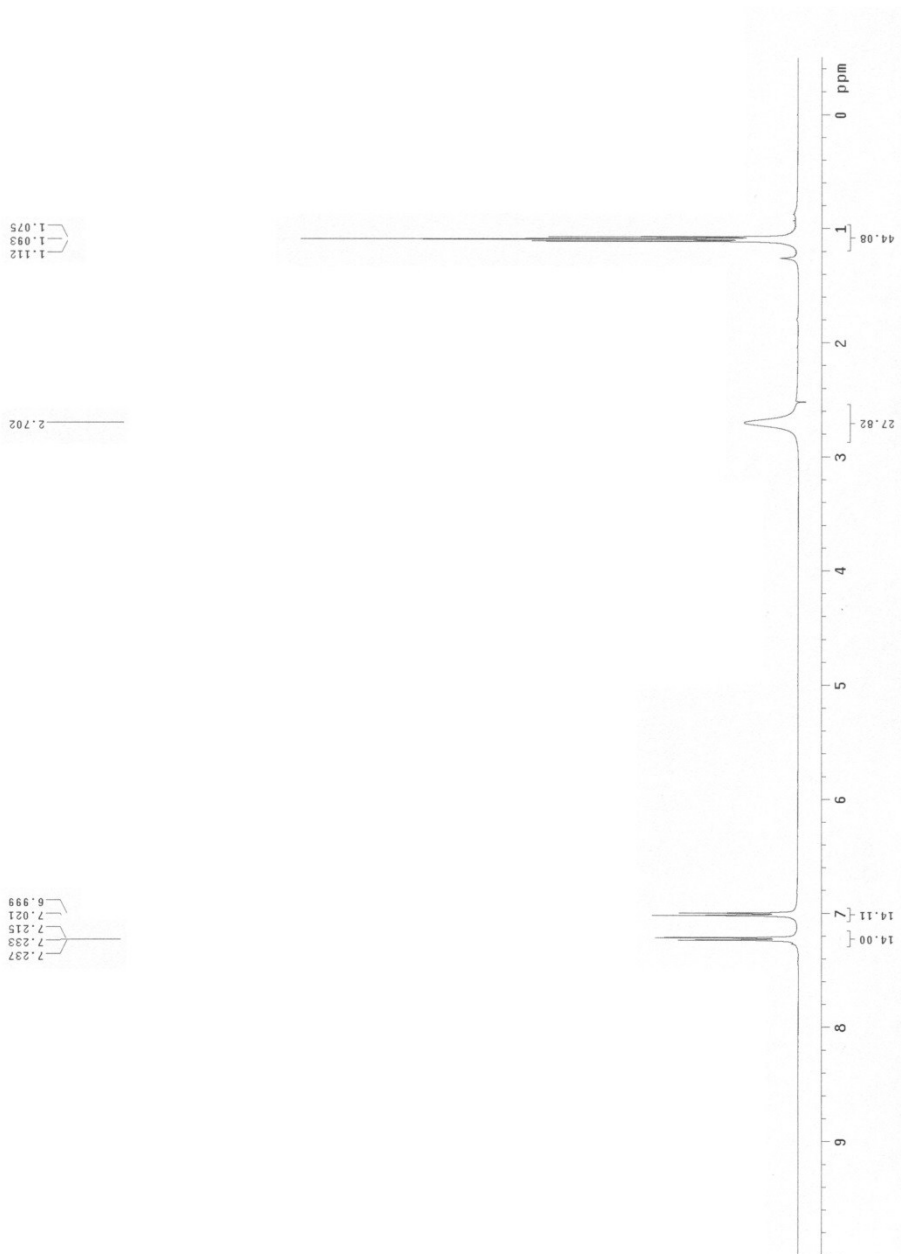

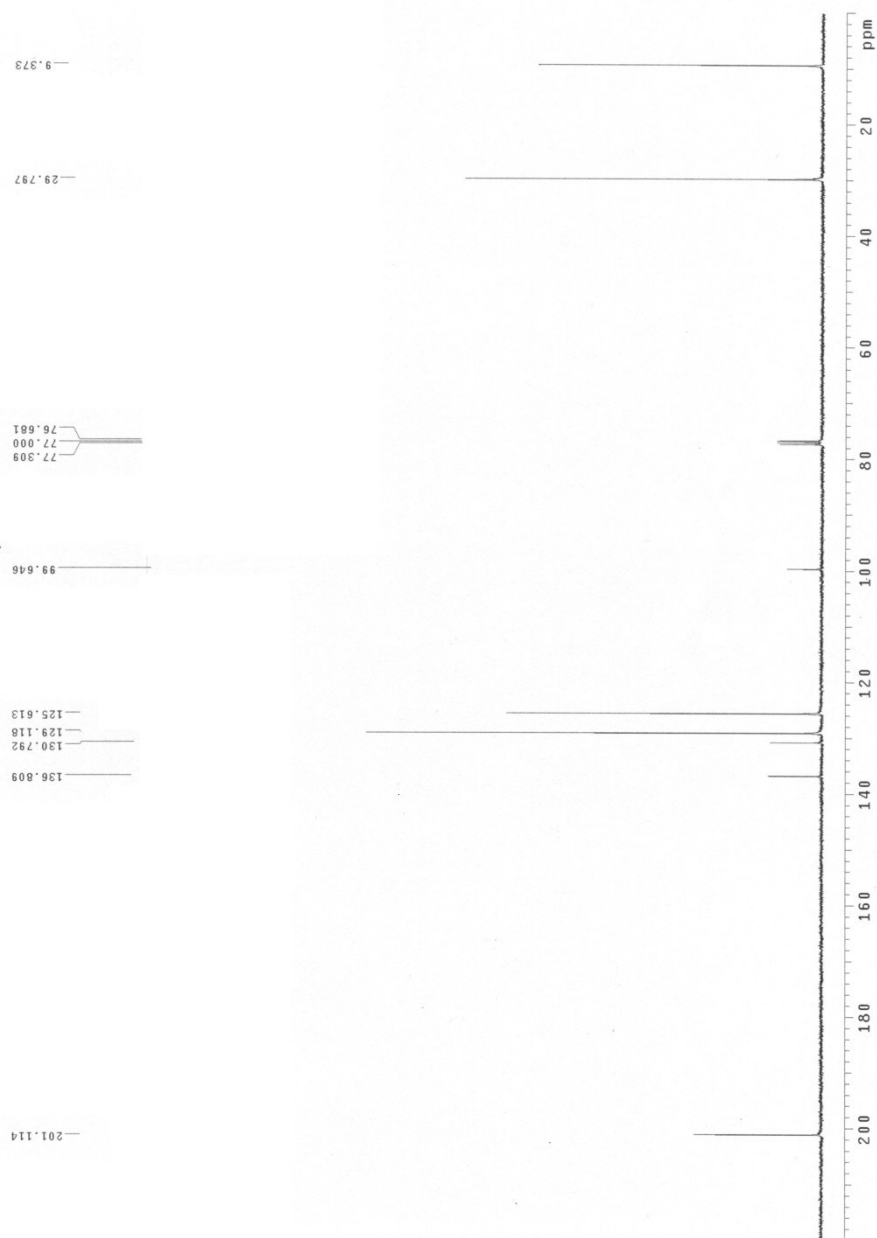

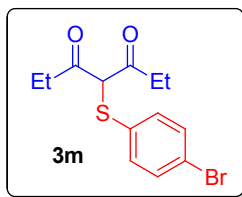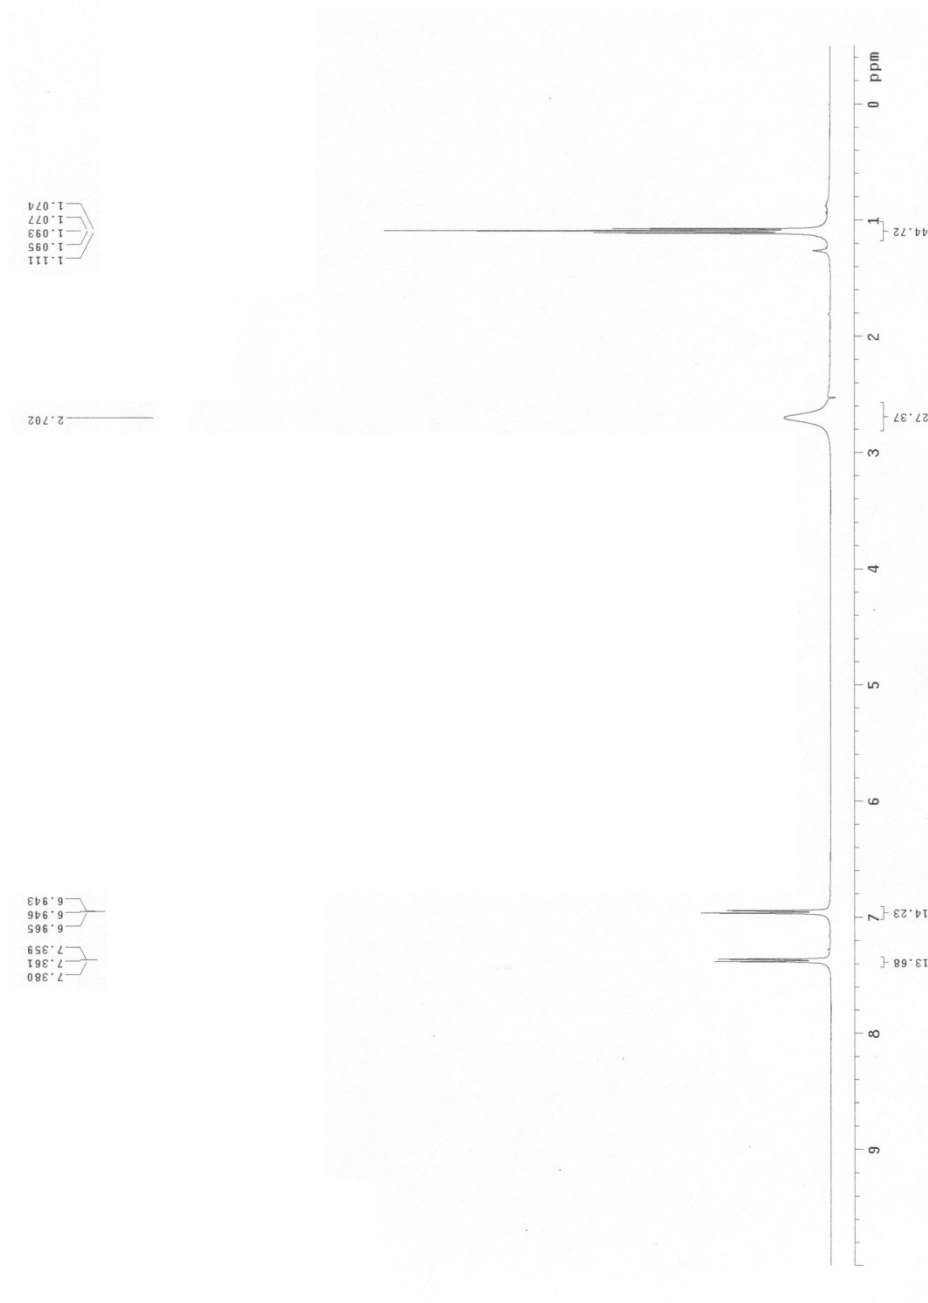

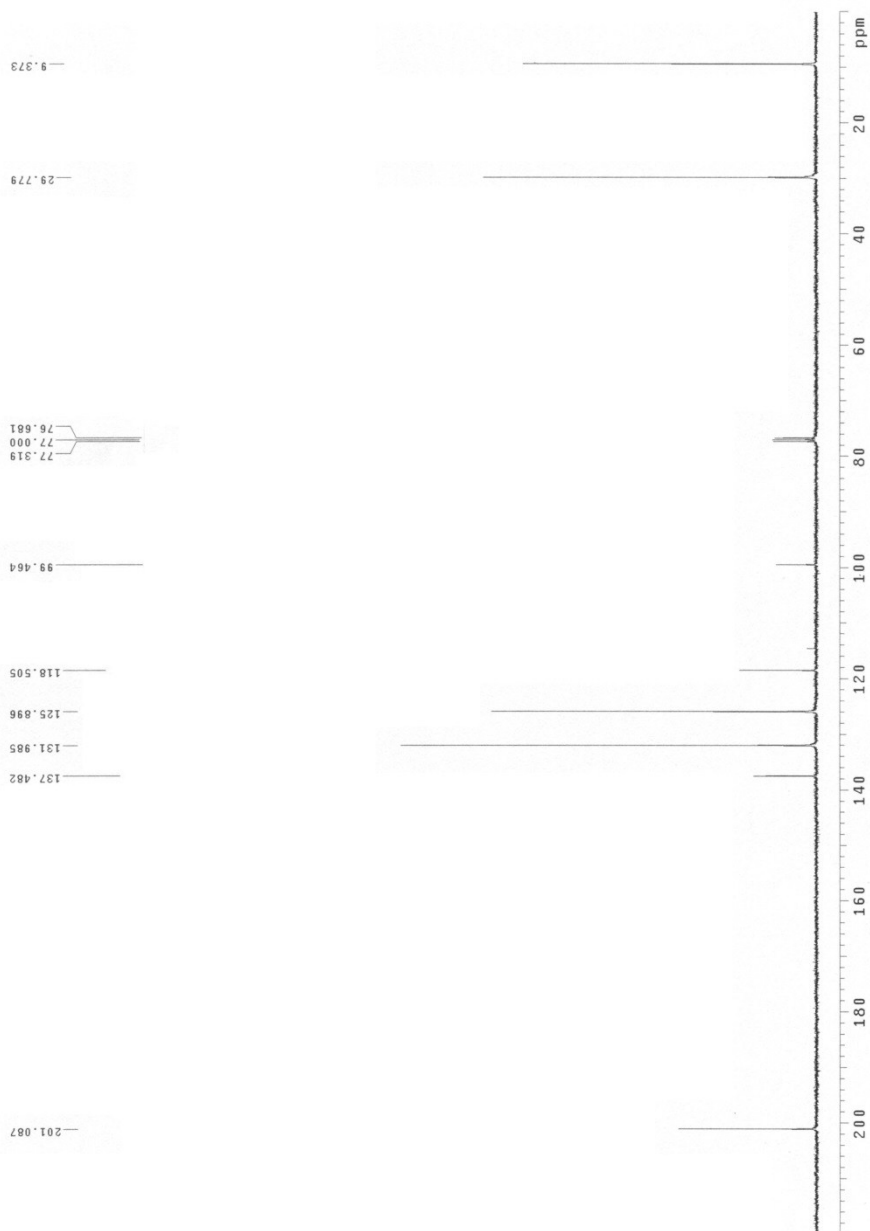

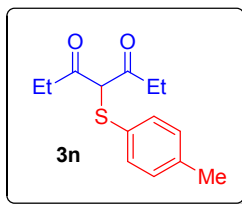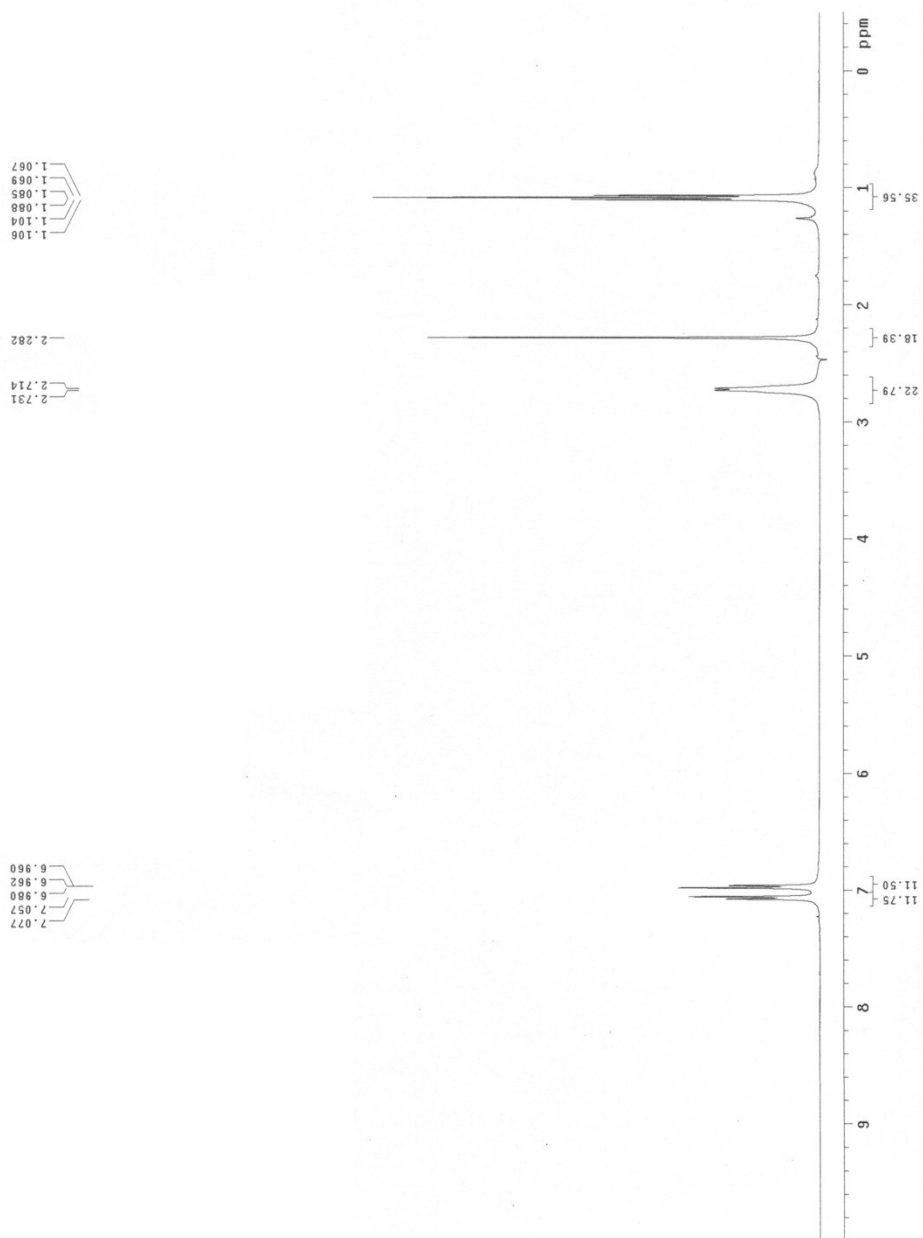



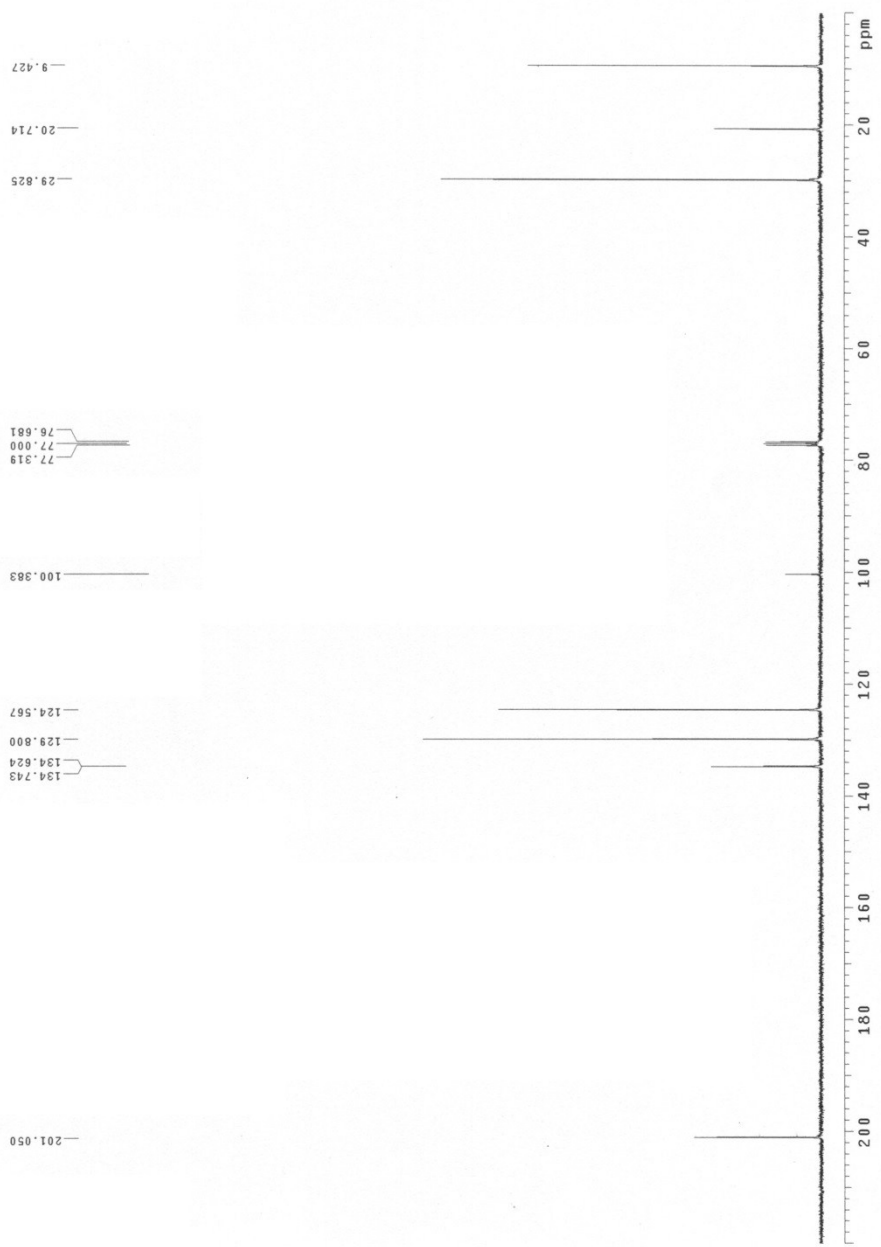

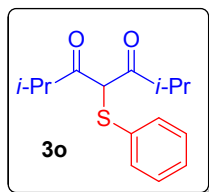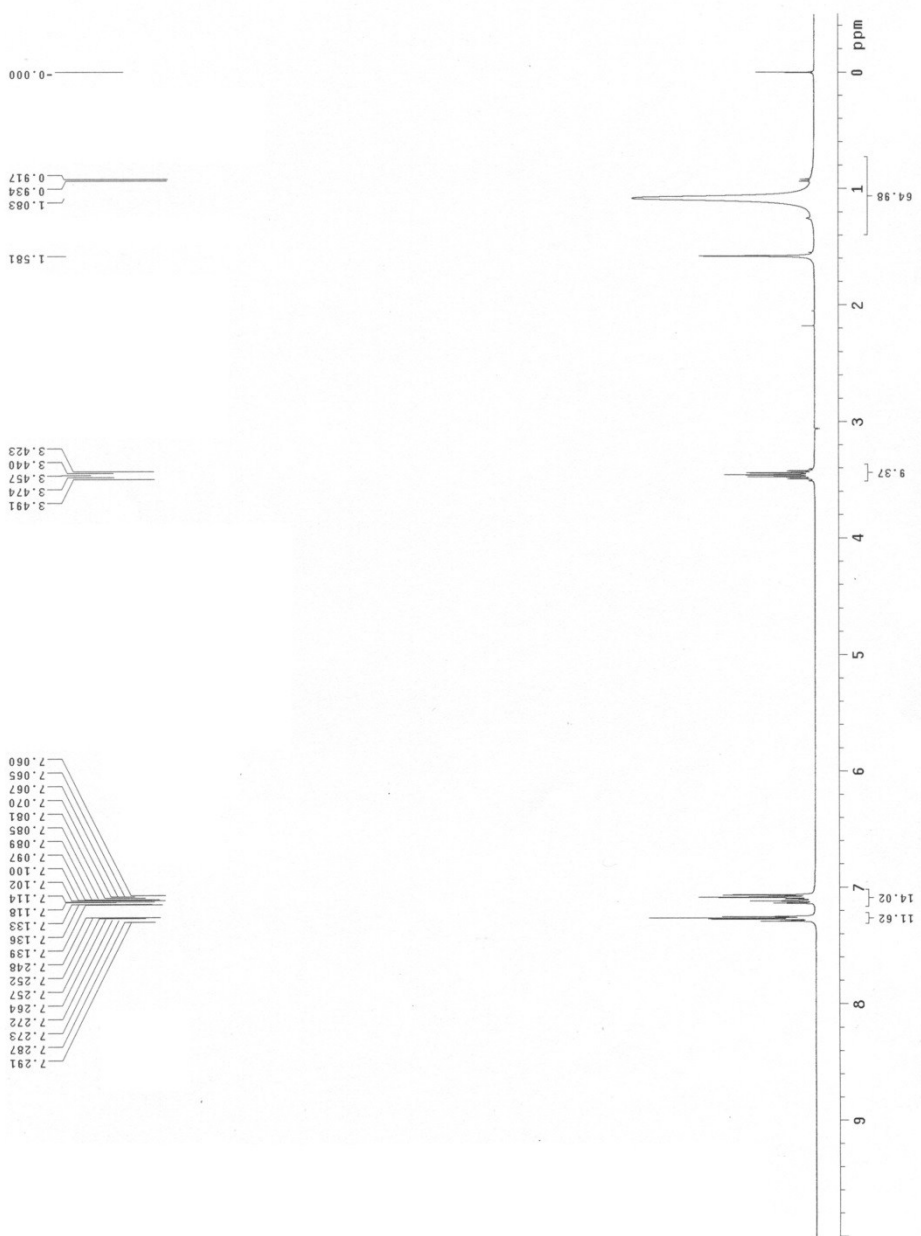

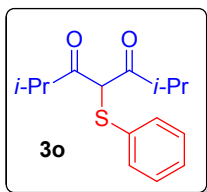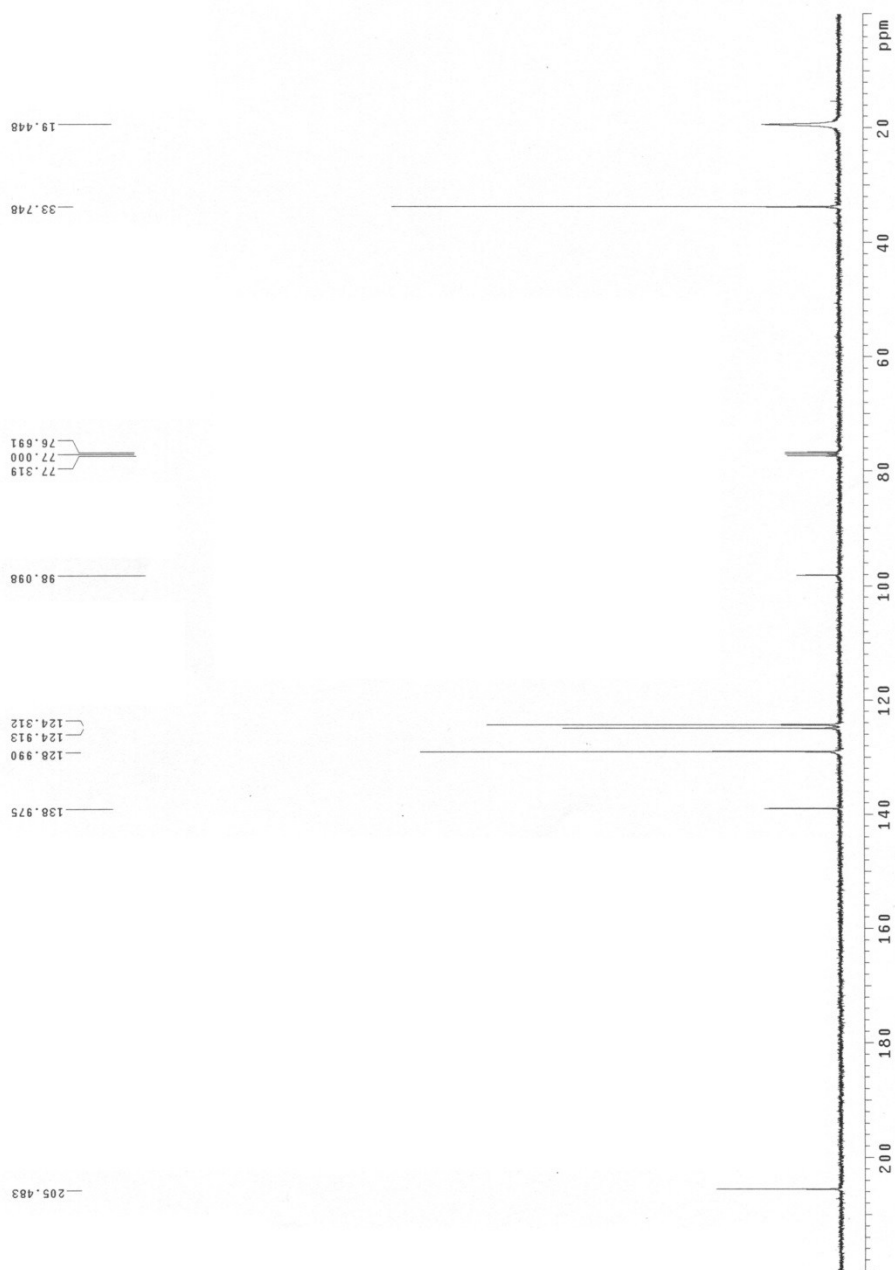

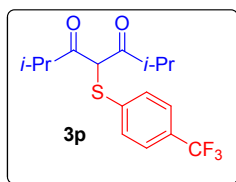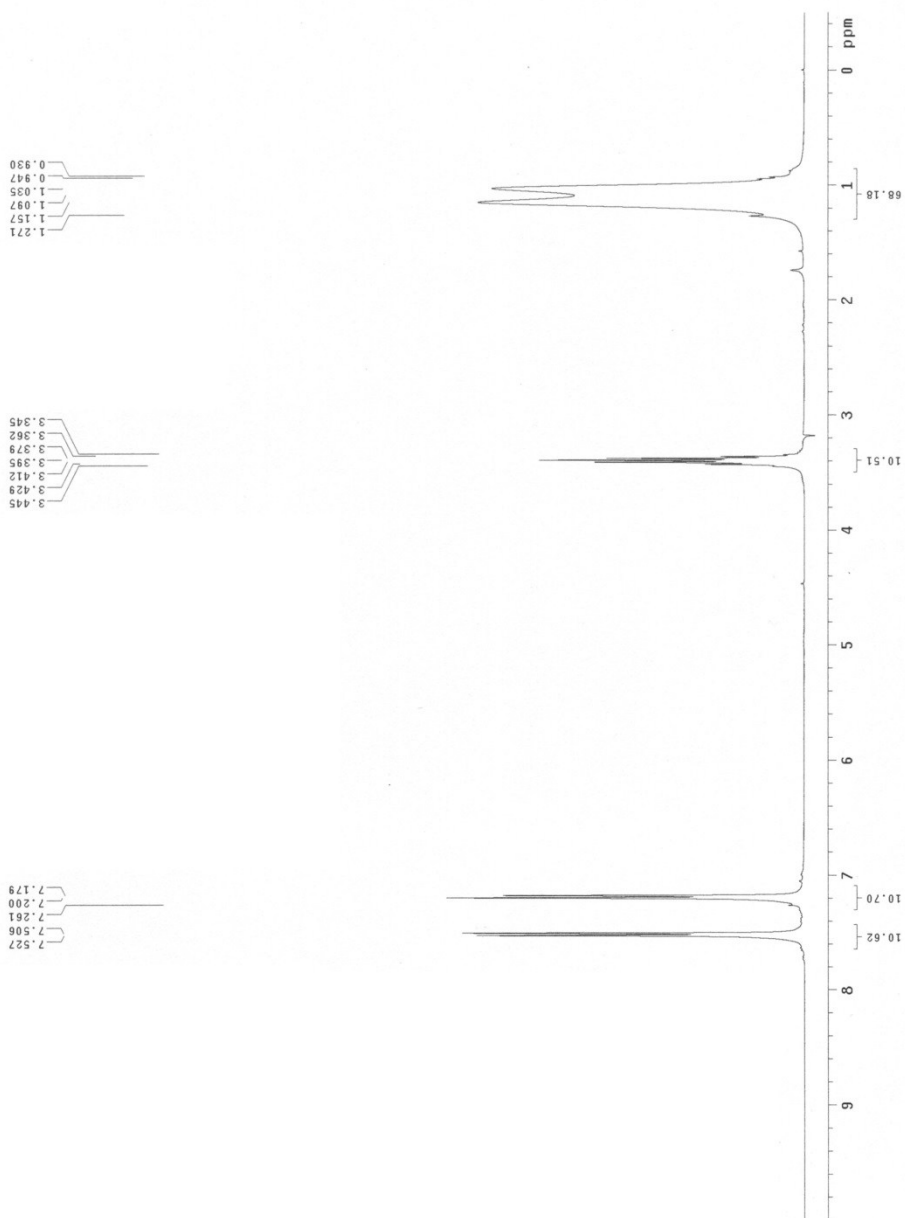

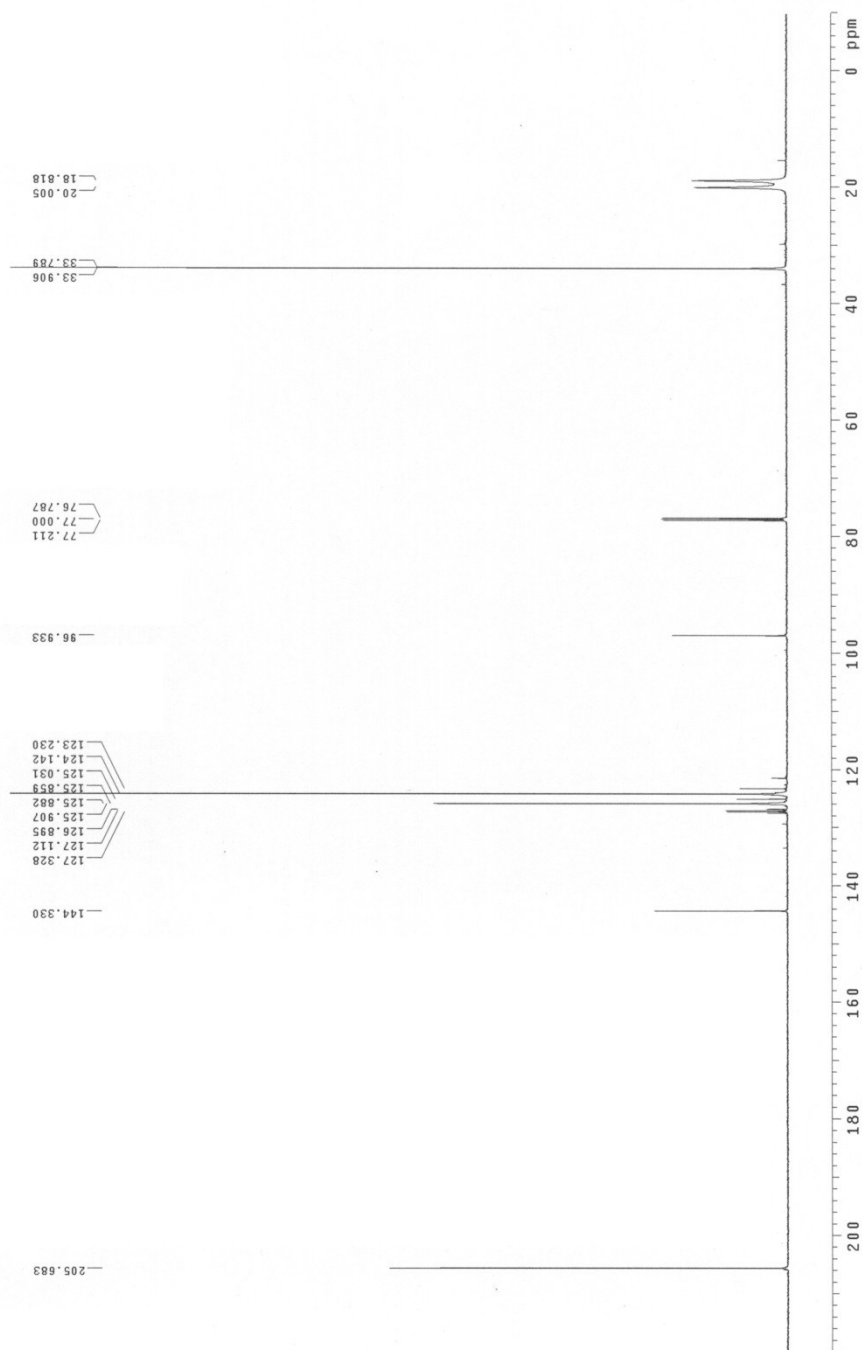

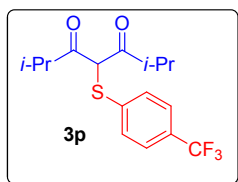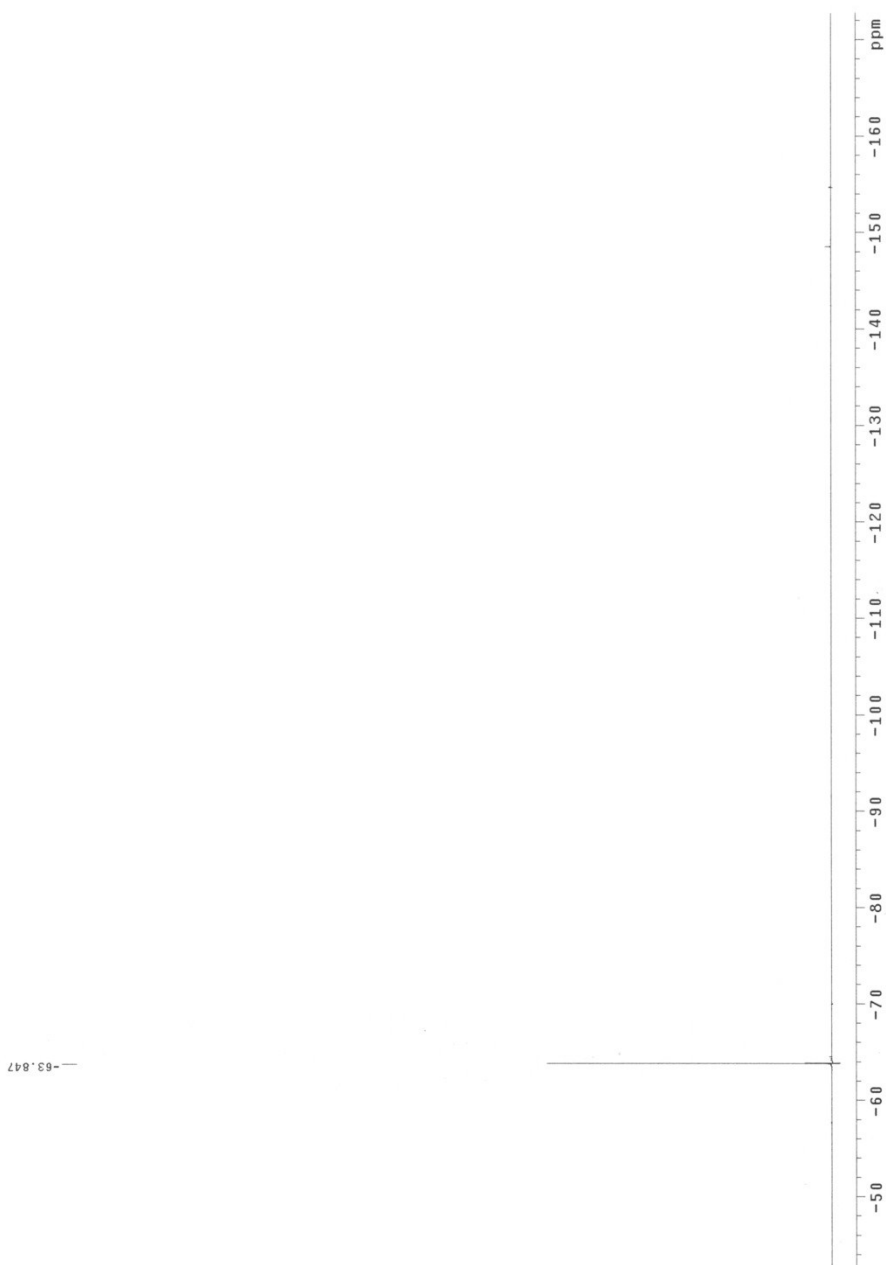

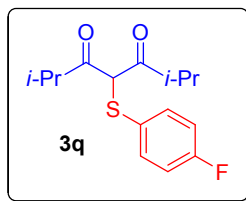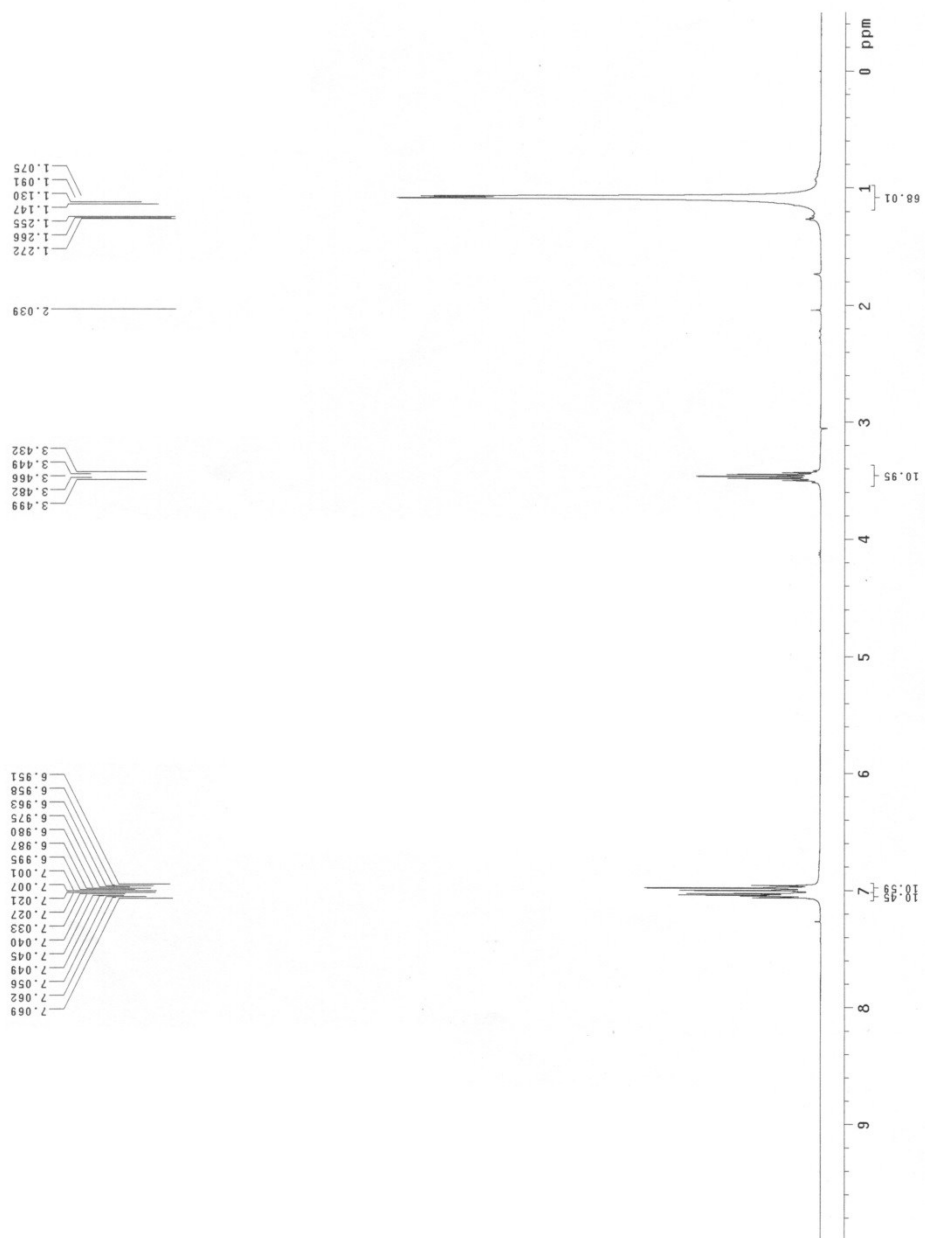

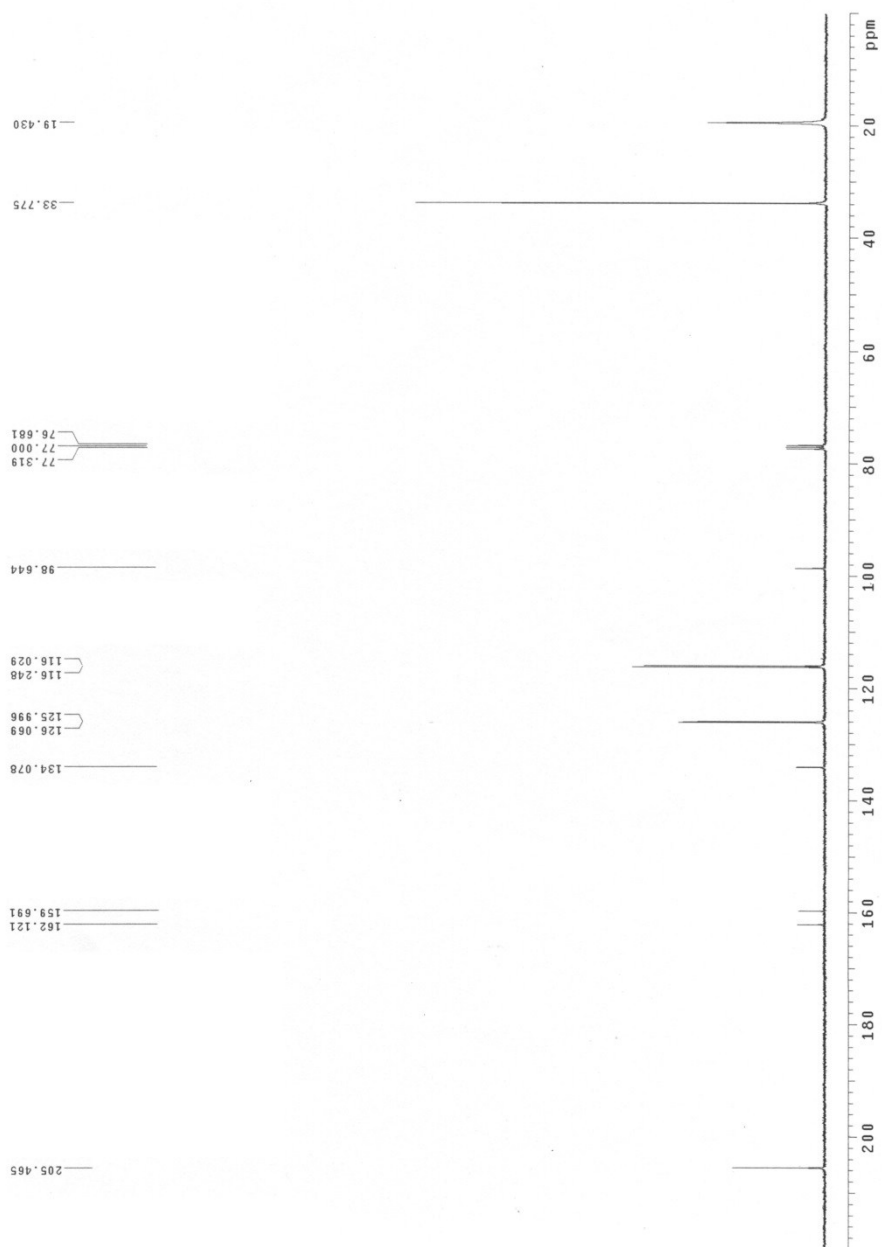



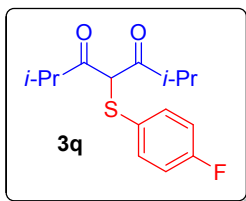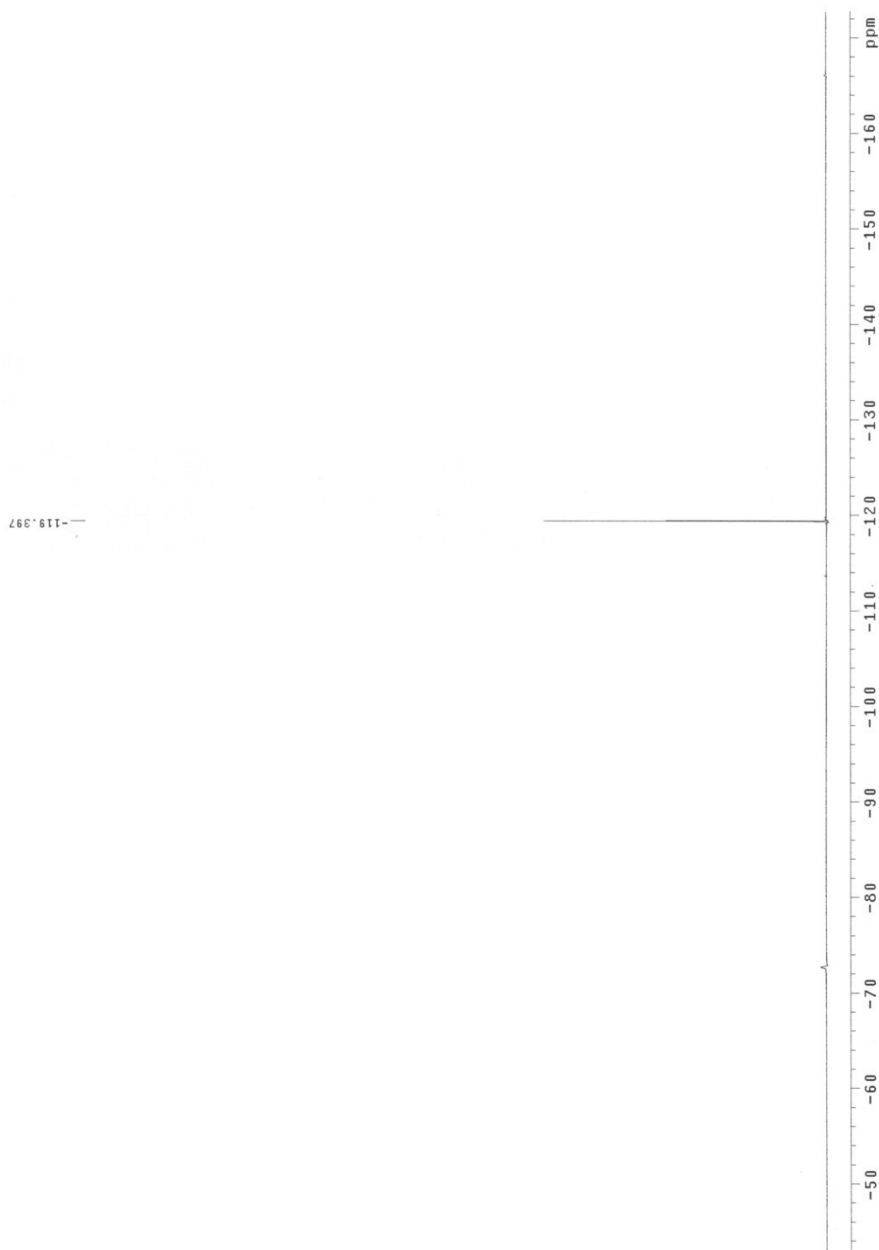

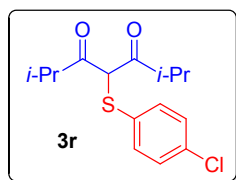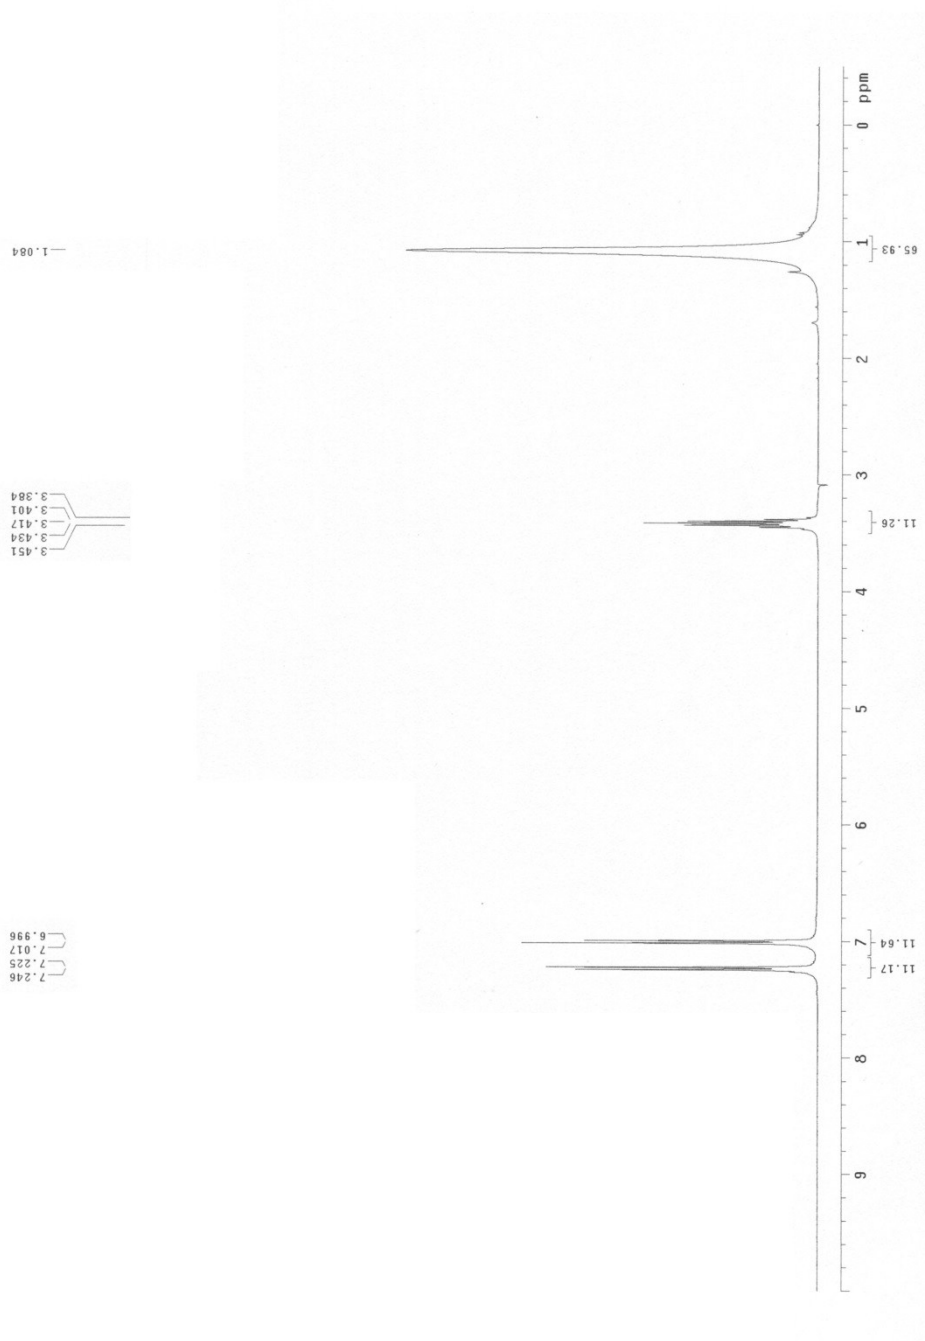

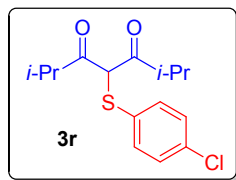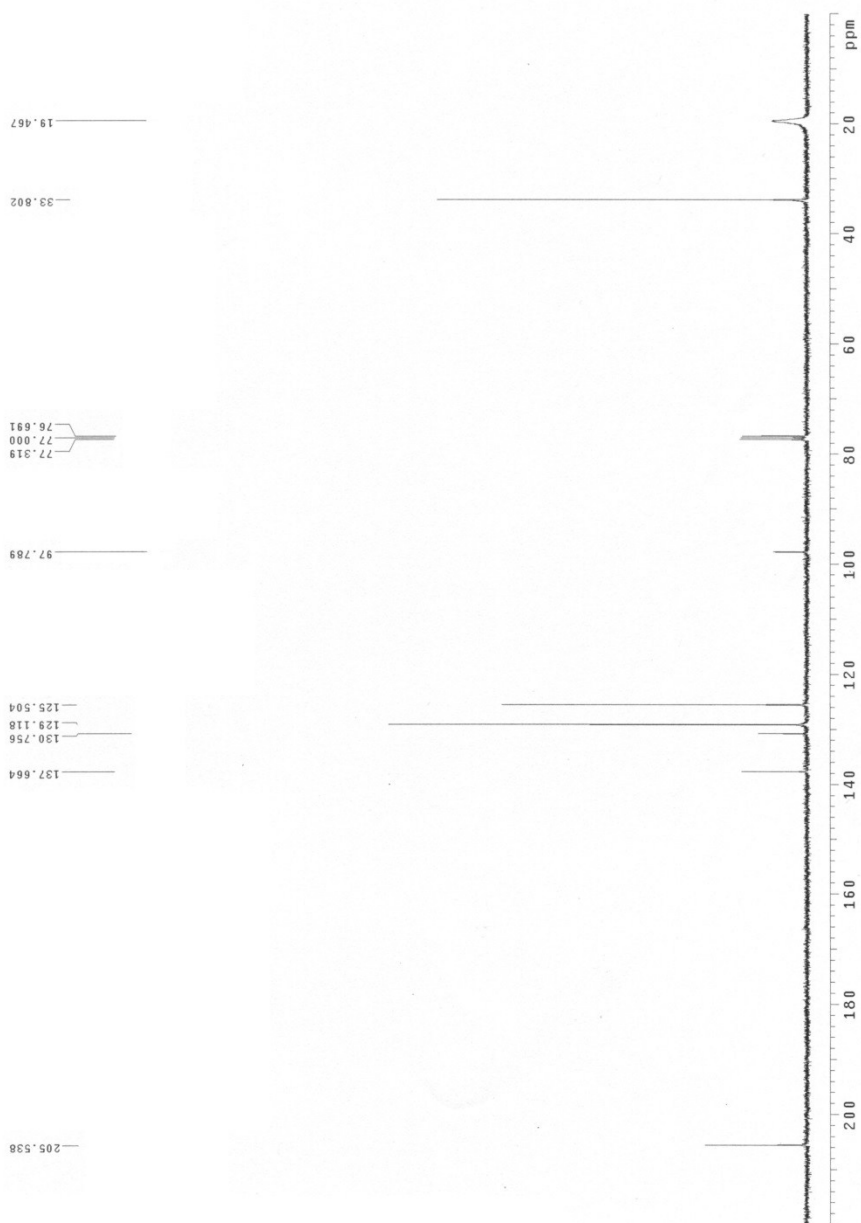

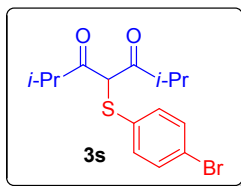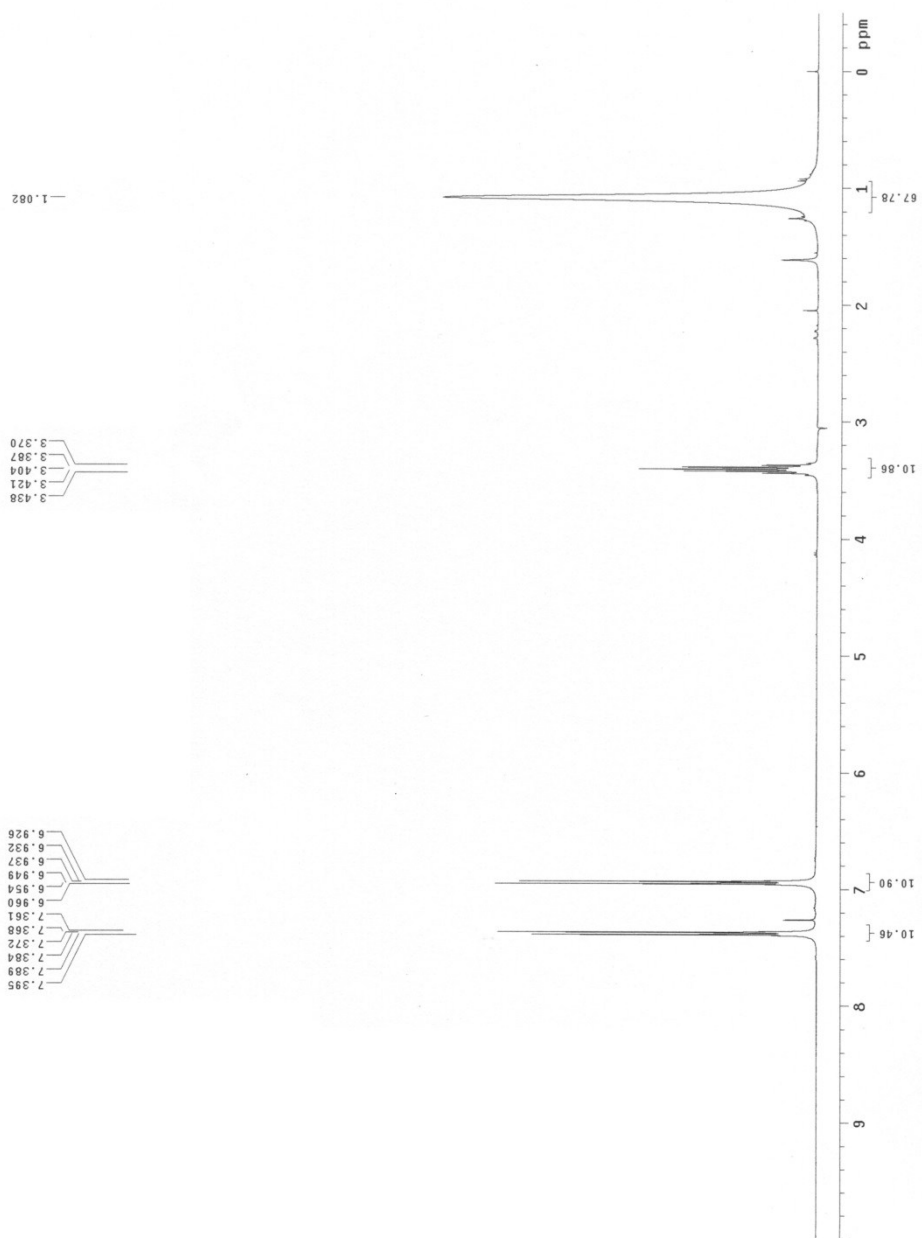

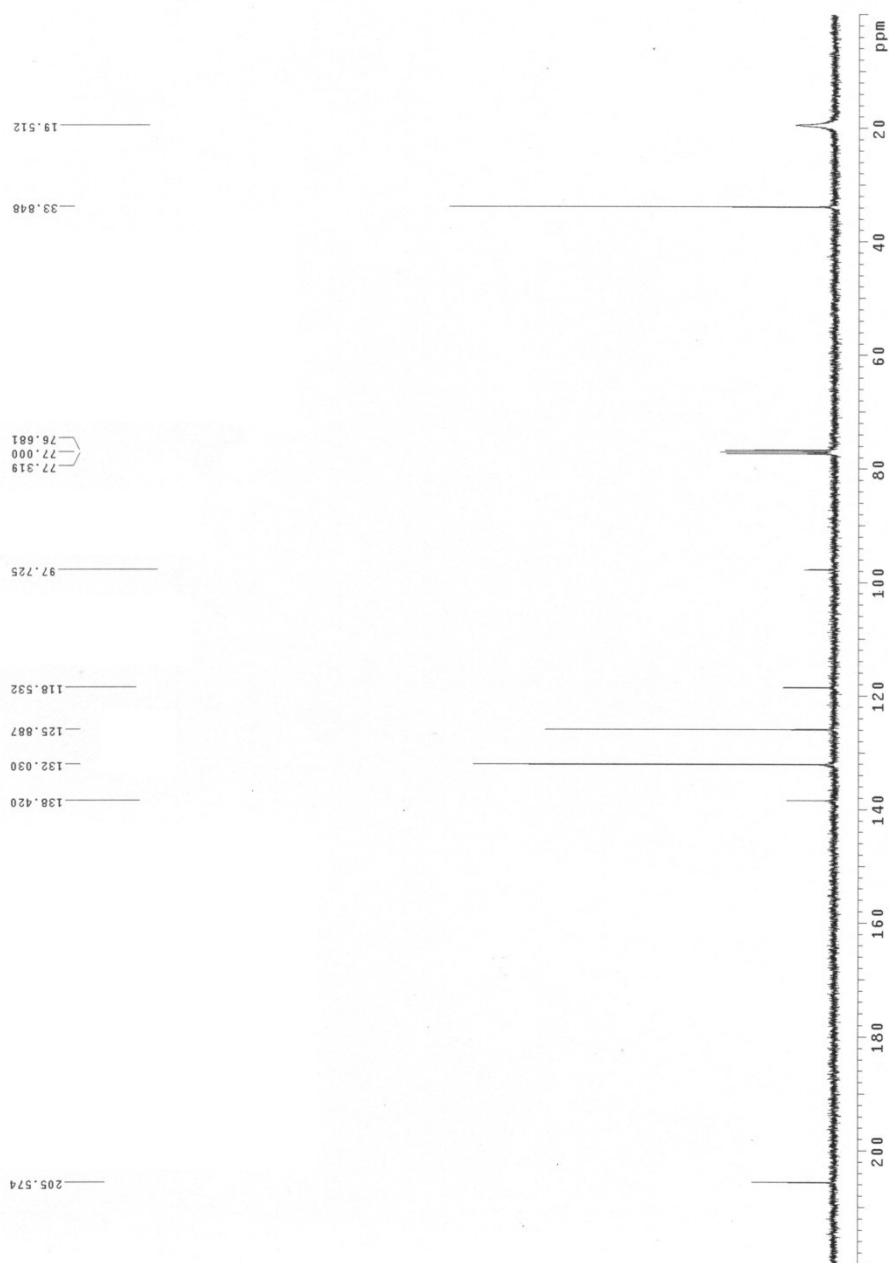

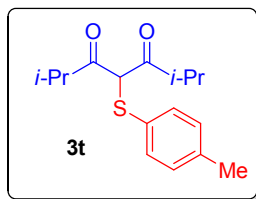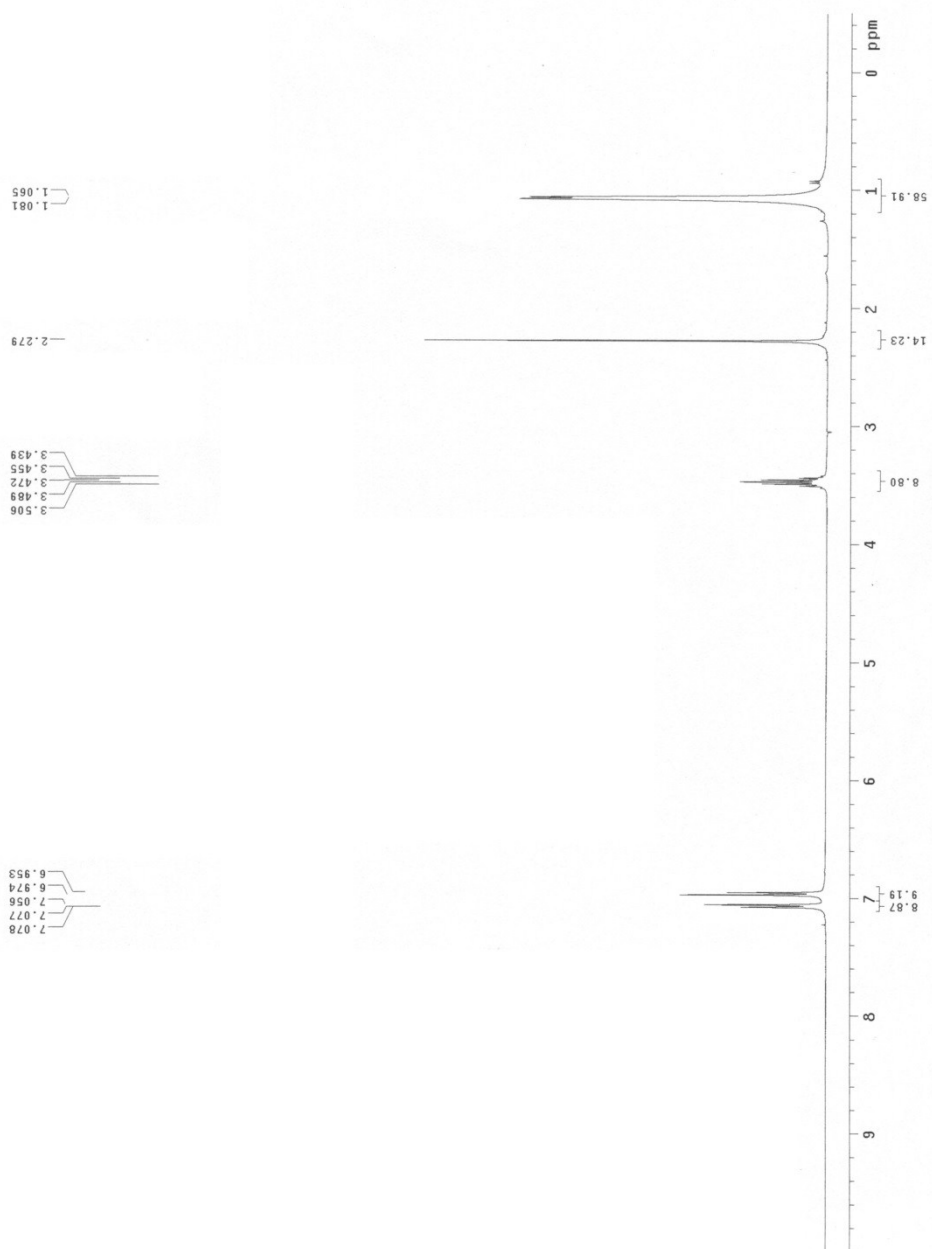

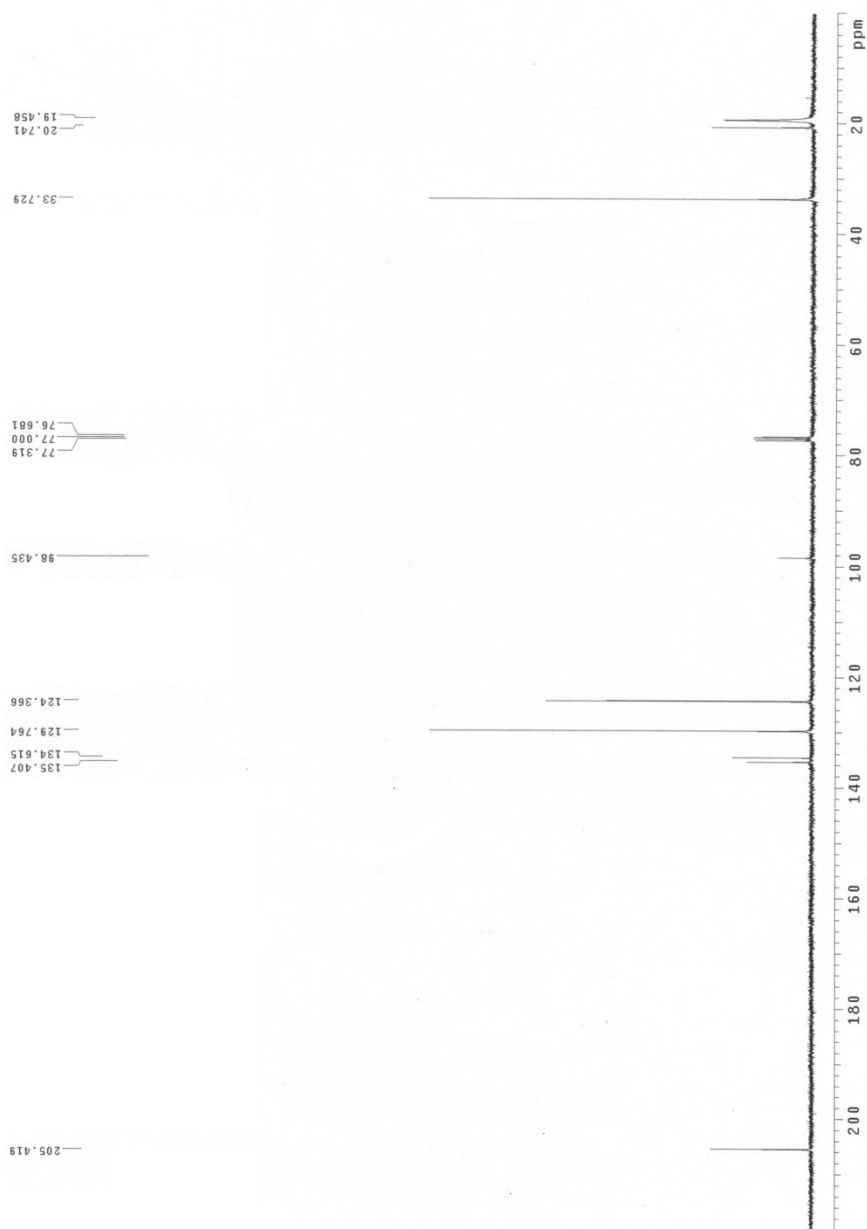

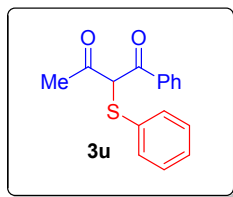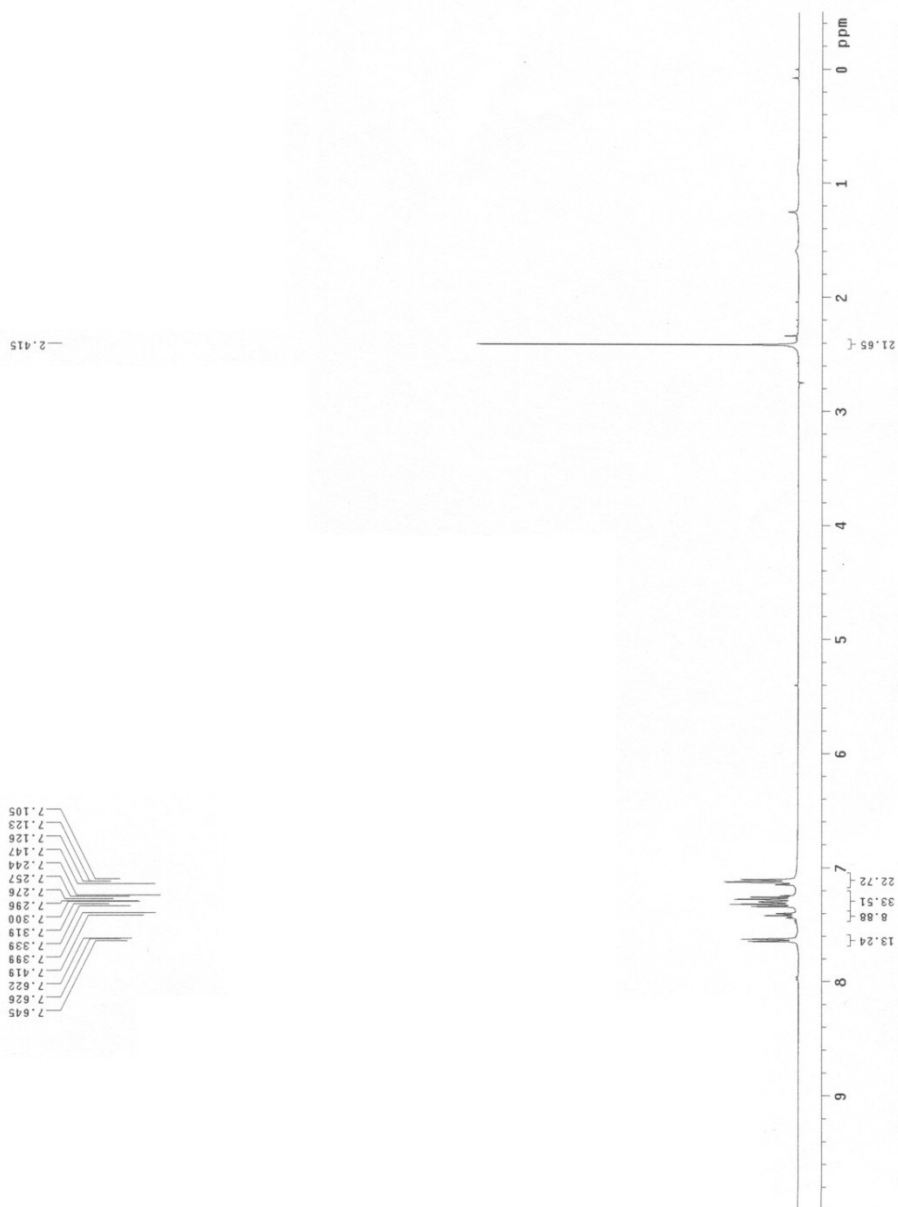



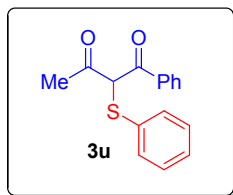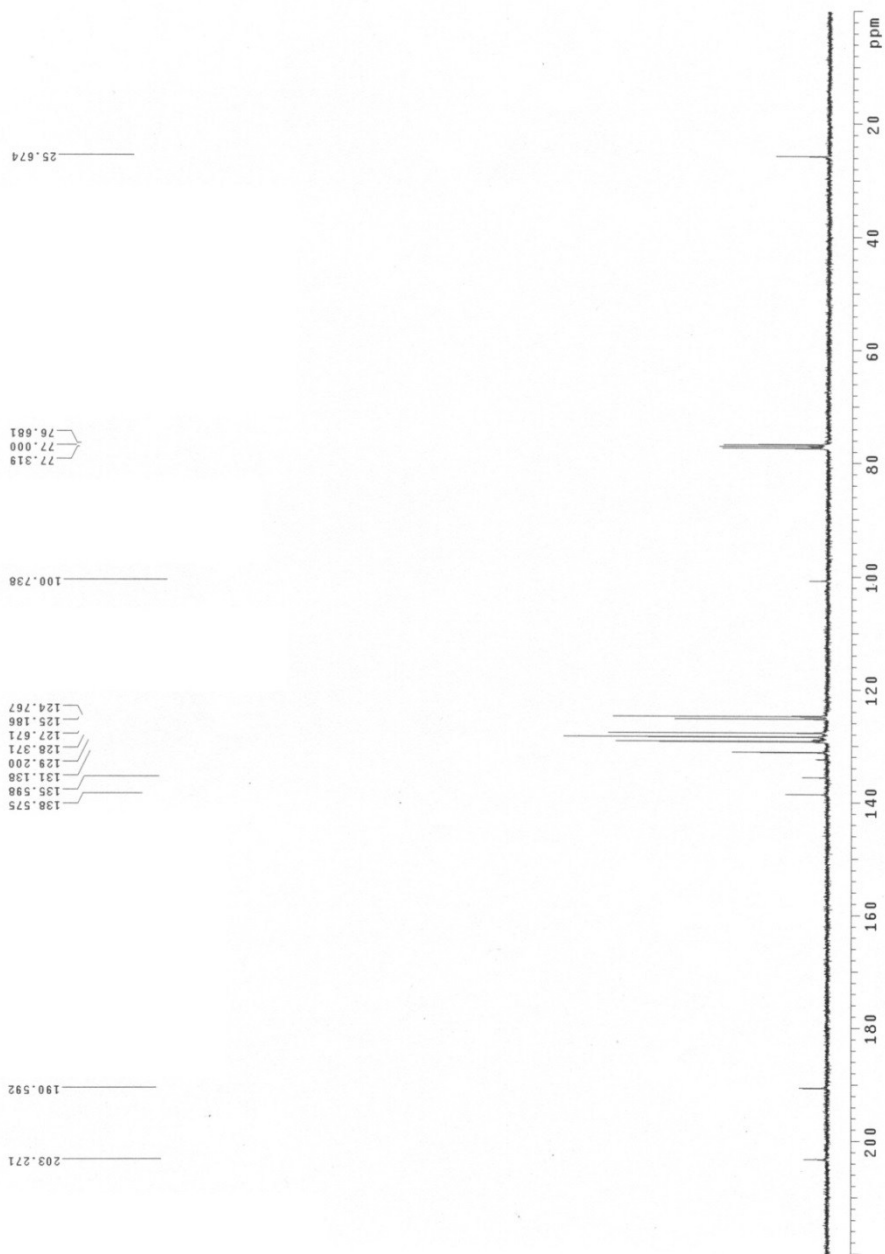

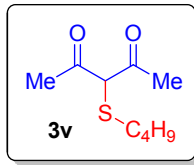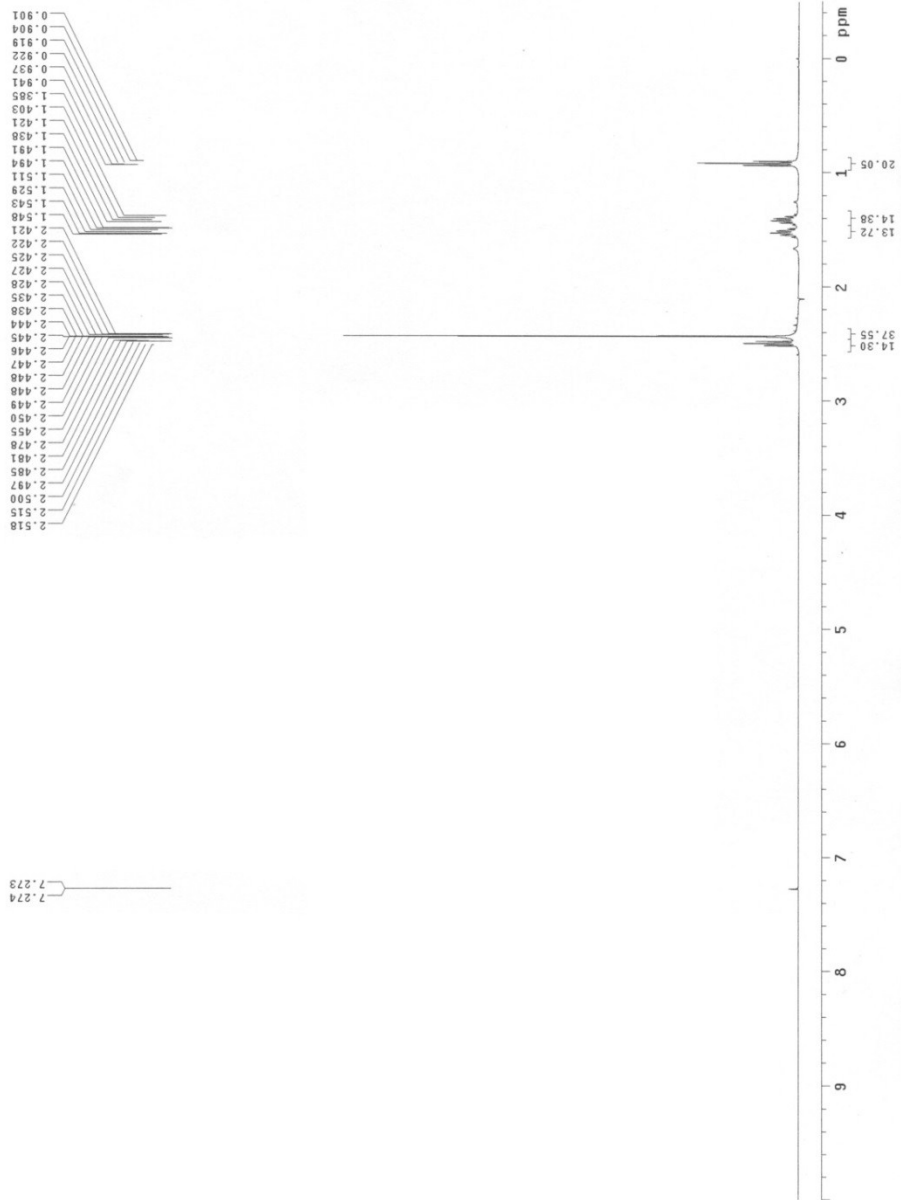

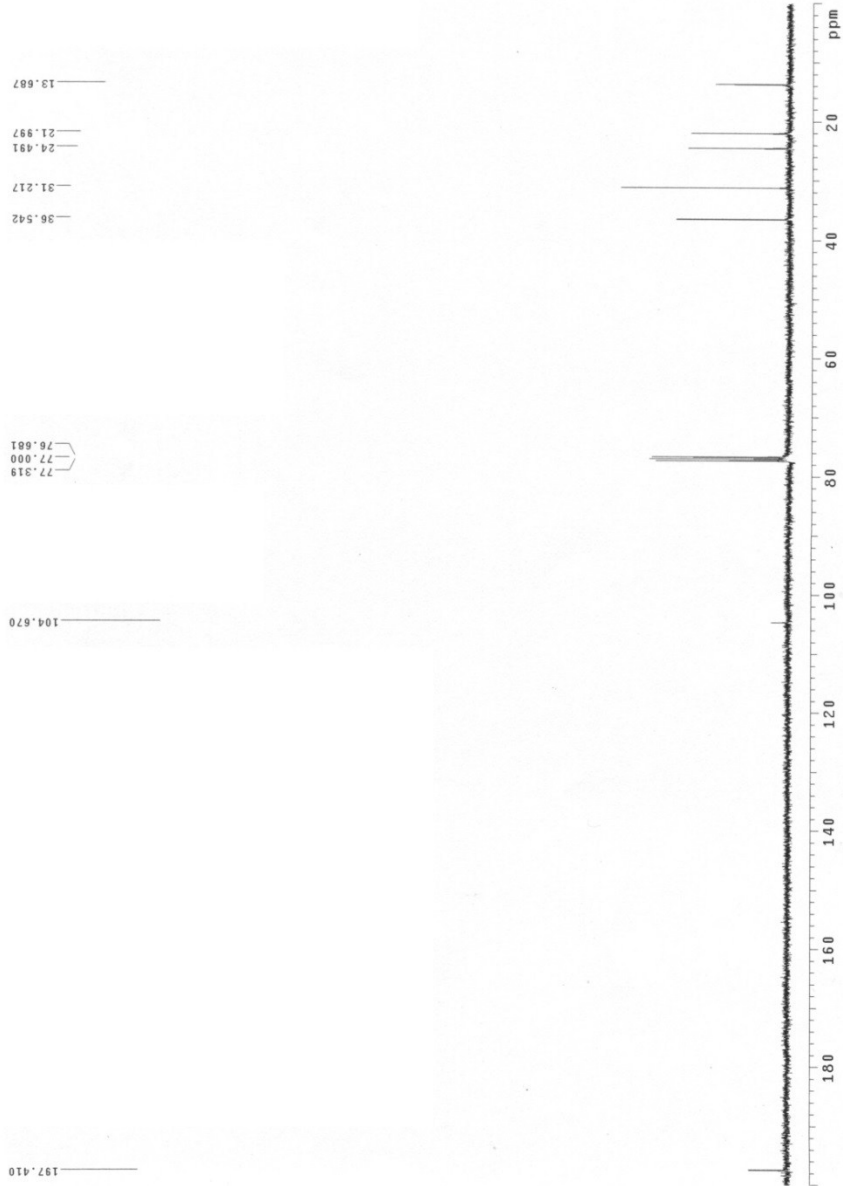

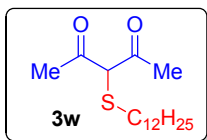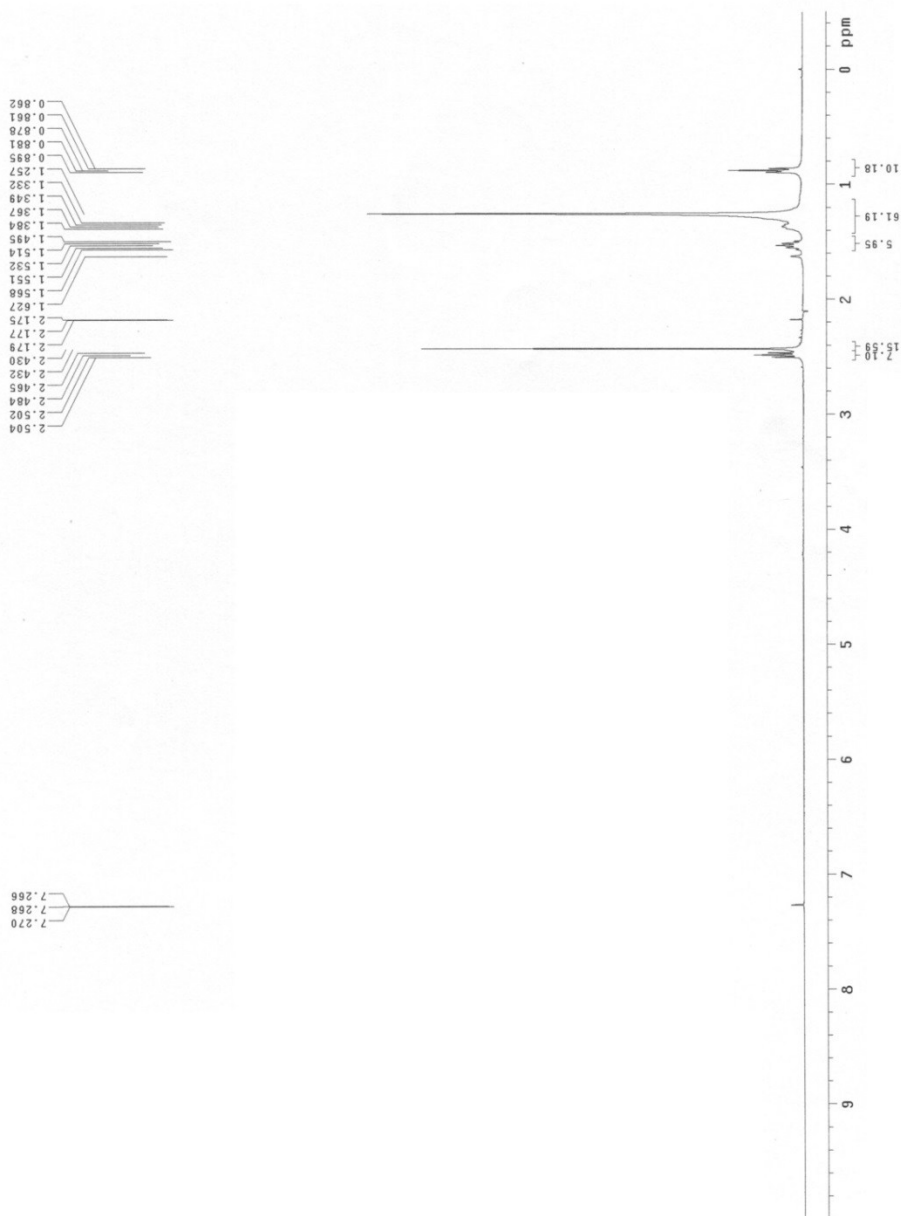

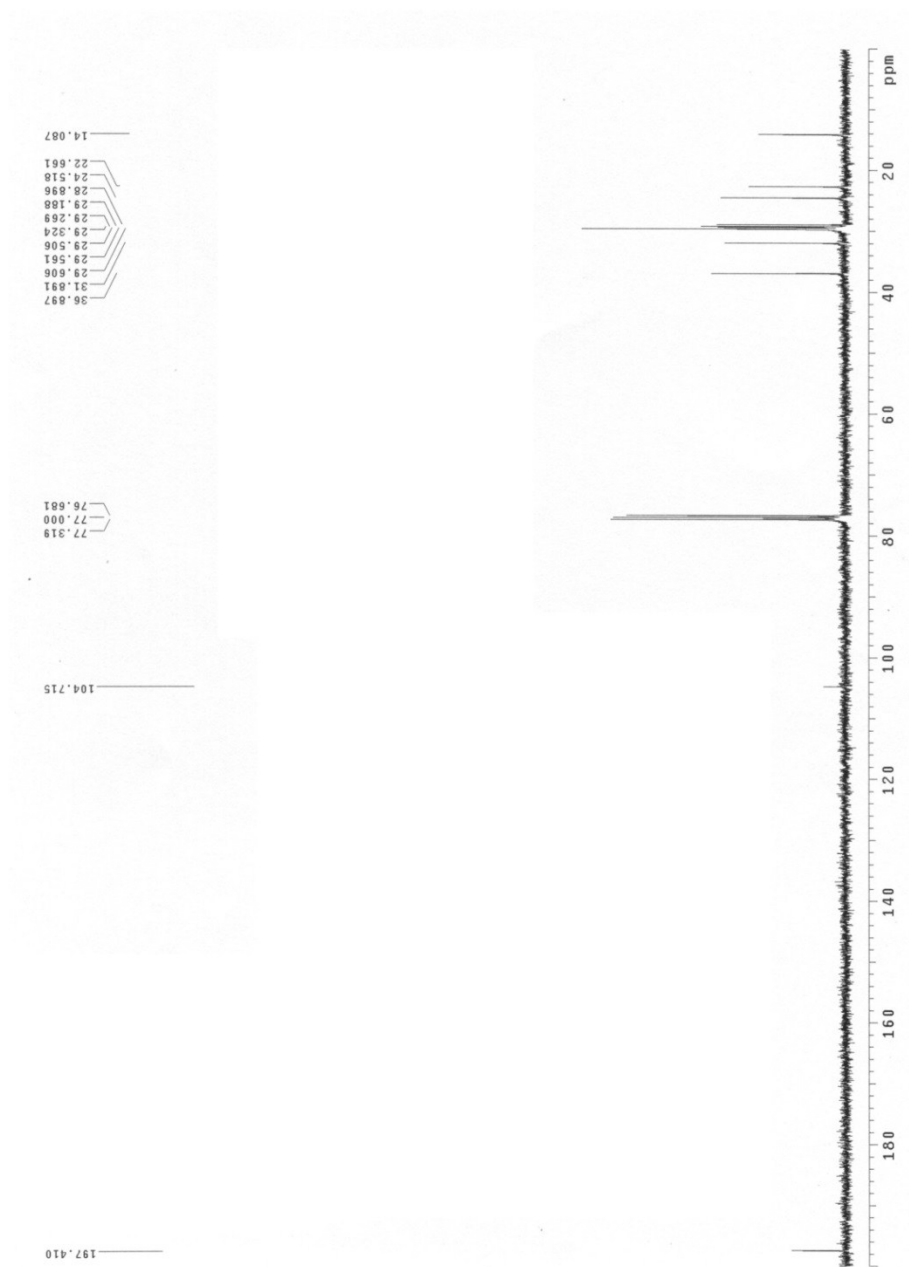

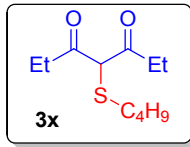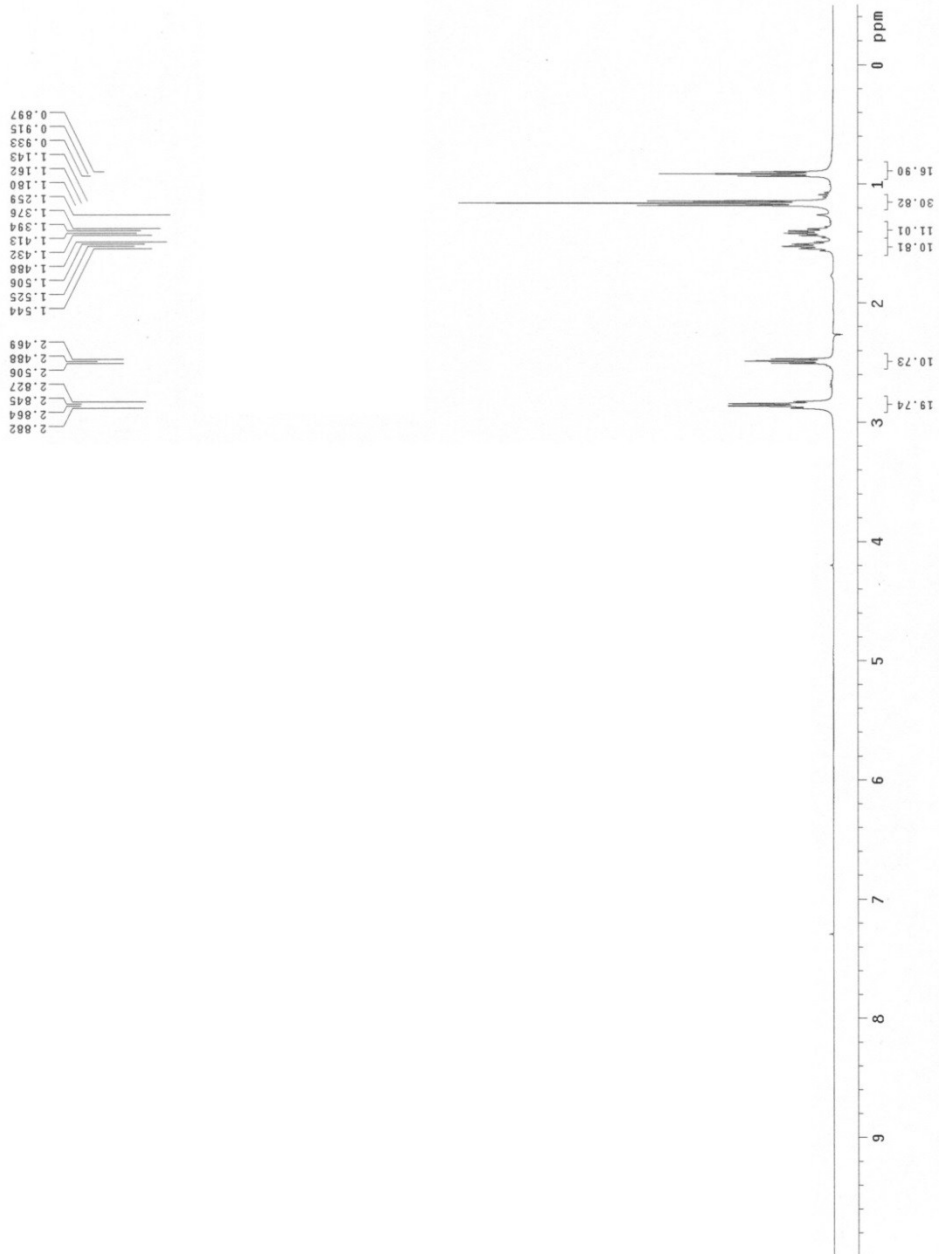

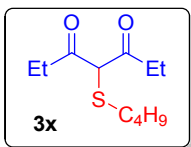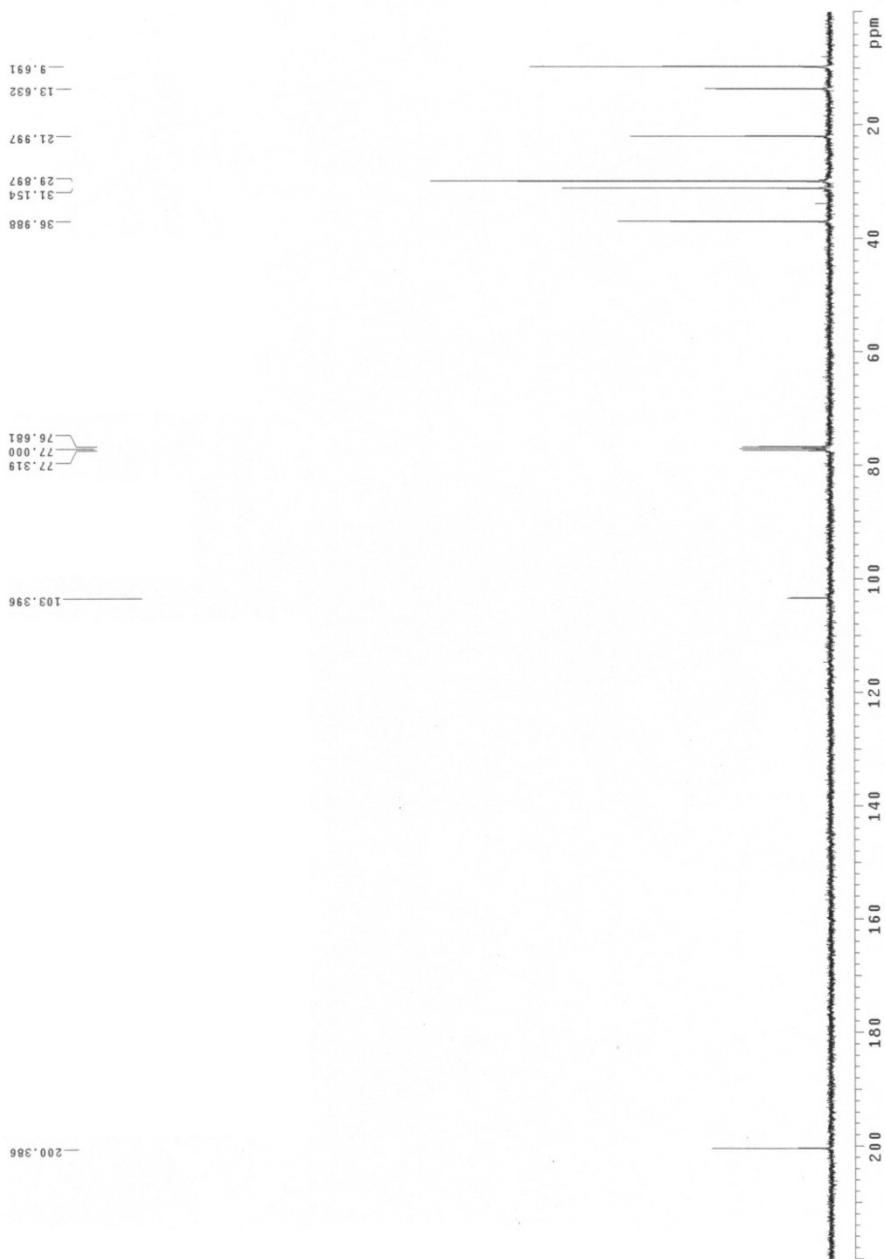

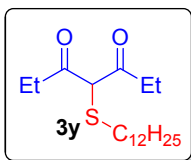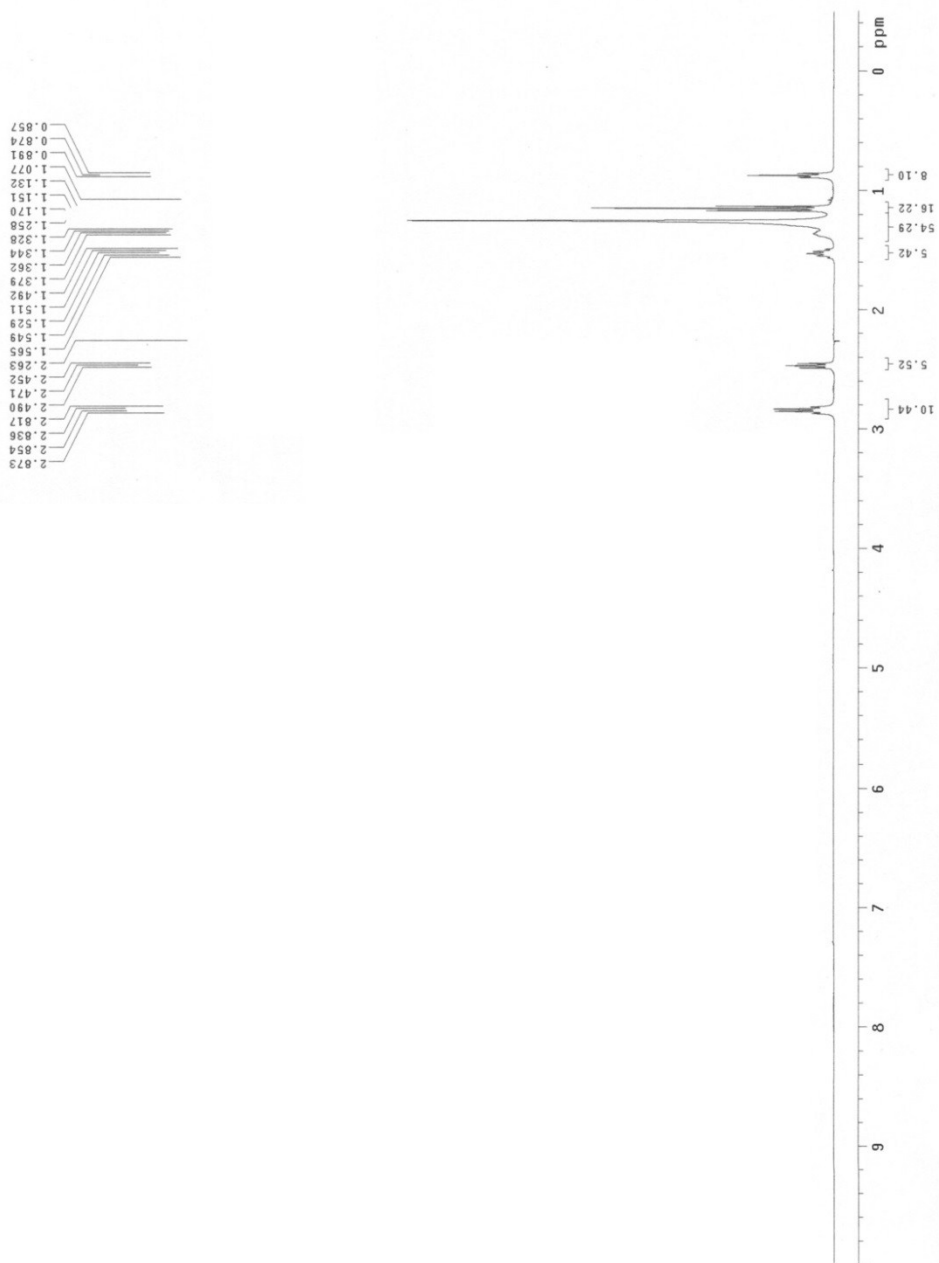



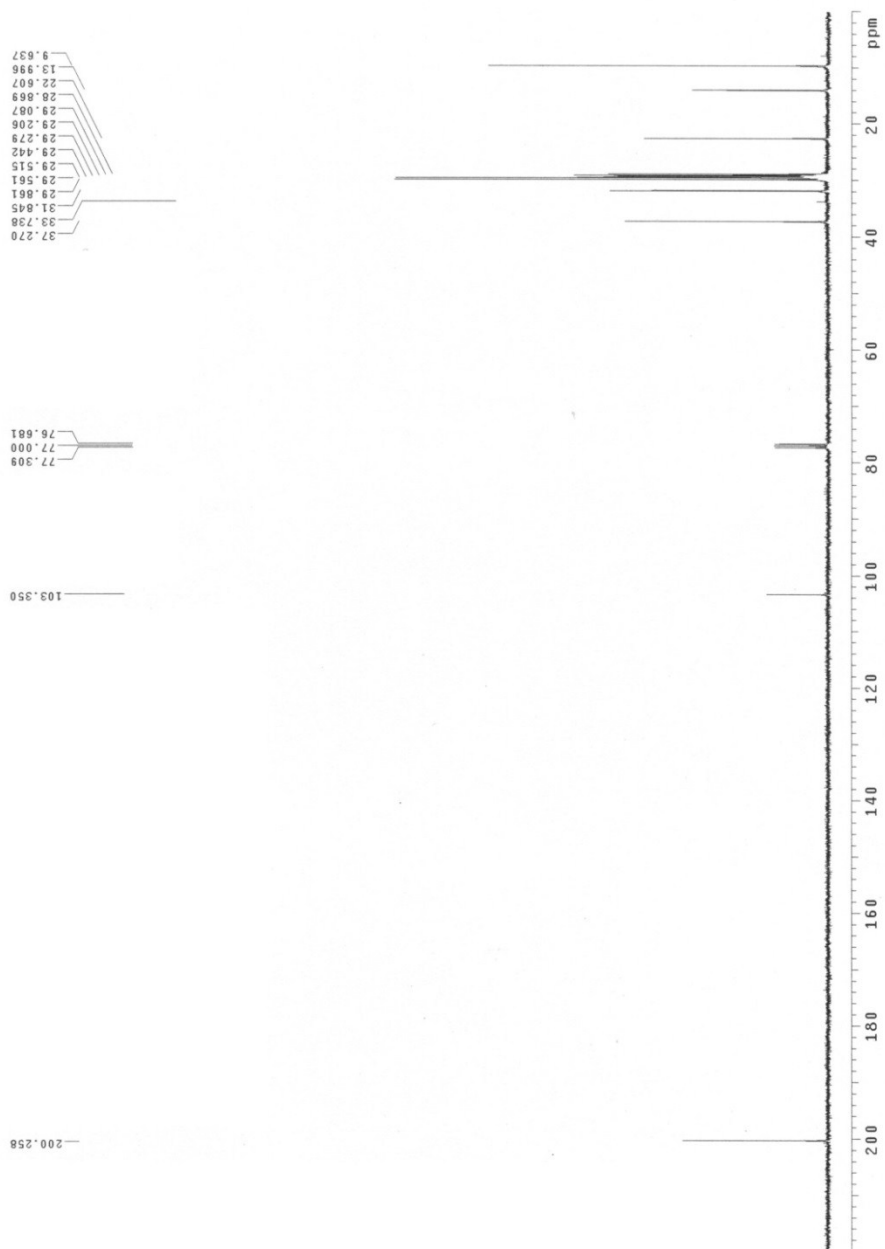

Supplement: c5ra07204b1.pdf [file c5ra07204b1.pdf]
